# Supplementary material for: Exploration of prognosis and immunometabolism landscapes in ER+ breast cancer based on a novel lipid metabolism-related signature
Source: PubMed Central journal article supplement (PMC10352658; doi:10.3389/fimmu.2023.1199465), 2023-07-04
Supplement: Table_1.pdf [file Table_1.pdf]

| Characteristic   | TCGA<br>n=802 | METABRIC<br>n=1444 | GSE7390<br>n=134 | GSE25066<br>n=298 | GSE4779<br>n=40 |
|------------------|---------------|--------------------|------------------|-------------------|-----------------|
| <b>Age</b>       |               |                    |                  |                   |                 |
| <=60             | 419           | 540                | 134              | 243               |                 |
| >60              | 383           | 904                |                  | 55                |                 |
| <b>T stage</b>   |               |                    |                  |                   |                 |
| I                | 211           | 530                | 76               | 18                |                 |
| II               | 452           | 823                | 58               | 150               | 29              |
| III              | 111           | 71                 |                  | 82                | 11              |
| IV               | 26            | 9                  |                  | 45                |                 |
| <b>N stage</b>   |               |                    |                  |                   |                 |
| N0               | 354           | 782                | 134              | 104               | 16              |
| N1               | 283           | 444                |                  | 141               | 24              |
| N2               | 90            | 156                |                  | 35                |                 |
| N3               | 59            | 62                 |                  | 18                |                 |
| <b>Stage</b>     |               |                    |                  |                   |                 |
| I                | 139           | 453                | 76               | 2                 |                 |
| II               | 442           | 739                | 58               | 169               | 34              |
| III              | 190           | 243                |                  | 126               | 6               |
| IV               | 15            |                    |                  |                   |                 |
| <b>Grade</b>     |               |                    |                  |                   |                 |
| I                |               | 156                | 29               | 29                |                 |
| II               |               | 675                | 68               | 152               |                 |
| III              |               | 556                | 35               | 101               |                 |
| <b>PR status</b> |               |                    |                  |                   |                 |
| Positive         | 676           | 945                |                  | 224               | 25              |
| Negative         | 123           | 499                |                  | 73                | 15              |
