# Supplementary material for: Exploration of prognosis and immunometabolism landscapes in ER+ breast cancer based on a novel lipid metabolism-related signature
Source: PubMed Central journal article supplement (PMC10352658; doi:10.3389/fimmu.2023.1199465), 2023-07-04
Supplement: Table_3.pdf [file Table_3.pdf]

IDO1  
LAG3  
CTLA4  
TNFRSF9  
ICOS  
CD80  
PDCD1LG2  
TIGIT  
CD70  
TNFSF9  
ICOSLG  
KIR3DL1  
CD86  
PDCD1  
LAIR1  
TNFRSF8  
TNFSF15  
TNFRSF14  
IDO2  
CD276  
CD40  
TNFRSF4  
TNFSF14  
HLA2  
CD244  
CD274  
HAVCR2  
CD27  
BTLA  
LGALS9  
TMIGD2  
CD28  
CD48  
TNFRSF25  
CD40LG  
ADORA2A  
VTCN1  
CD160  
CD44  
TNFSF18  
TNFRSF18  
BTNL2  
C10ORF54  
CD200R1  
TNFSF4  
CD200  
NRP1
