# Supplementary material for: Exploration of prognosis and immunometabolism landscapes in ER+ breast cancer based on a novel lipid metabolism-related signature
Source: PubMed Central journal article supplement (PMC10352658; doi:10.3389/fimmu.2023.1199465), 2023-07-04
Supplement: Table_4.pdf [file Table_4.pdf]

| id       | HR       | HR.95L   | HR.95H   | pvalue   |
|----------|----------|----------|----------|----------|
| FABP7    | 0.796247 | 0.715804 | 0.88573  | 2.75E-05 |
| ALDH3A1  | 0.823972 | 0.751443 | 0.903501 | 3.81E-05 |
| CA6      | 0.867991 | 0.805327 | 0.935531 | 0.000213 |
| CYP24A1  | 0.880552 | 0.819689 | 0.945935 | 0.0005   |
| ALOX15   | 1.156189 | 1.064803 | 1.255417 | 0.000551 |
| OCRL     | 1.583378 | 1.213332 | 2.066281 | 0.000715 |
| CERS3    | 0.882821 | 0.821111 | 0.94917  | 0.000749 |
| NFKBIE   | 0.676905 | 0.534054 | 0.857967 | 0.001253 |
| CYP27A1  | 0.772061 | 0.657381 | 0.906747 | 0.001615 |
| ACBD5    | 1.474306 | 1.155115 | 1.881699 | 0.001819 |
| CYP2D6   | 0.77761  | 0.660354 | 0.915686 | 0.00256  |
| SOAT2    | 0.890336 | 0.825353 | 0.960435 | 0.002665 |
| CEL      | 1.177693 | 1.05804  | 1.310878 | 0.002771 |
| NCOA2    | 1.404911 | 1.124196 | 1.755723 | 0.002796 |
| CBR1     | 0.784433 | 0.668673 | 0.920233 | 0.002879 |
| THEM5    | 0.756365 | 0.628548 | 0.910175 | 0.003112 |
| PTGES3   | 1.639032 | 1.180549 | 2.275571 | 0.003163 |
| PCYT2    | 0.686489 | 0.533731 | 0.882967 | 0.003399 |
| CBR3     | 0.785705 | 0.6683   | 0.923736 | 0.003493 |
| ADH6     | 0.886235 | 0.816826 | 0.961542 | 0.003703 |
| S1PR4    | 0.836061 | 0.740759 | 0.943623 | 0.003735 |
| CHKB     | 0.687521 | 0.533578 | 0.885878 | 0.003769 |
| SYNJ2    | 1.462226 | 1.129548 | 1.892886 | 0.003916 |
| NFKBIA   | 0.660259 | 0.497602 | 0.876085 | 0.004018 |
| CDK19    | 1.349904 | 1.099673 | 1.657076 | 0.004127 |
| OSBPL10  | 1.4121   | 1.113348 | 1.791018 | 0.004437 |
| ACAA1    | 0.677111 | 0.517272 | 0.886341 | 0.004537 |
| SPHK1    | 0.769603 | 0.641839 | 0.922799 | 0.004693 |
| CYP4B1   | 1.140785 | 1.040749 | 1.250436 | 0.004909 |
| INSIG2   | 1.525931 | 1.135937 | 2.049818 | 0.00501  |
| PRKAB2   | 1.463591 | 1.119196 | 1.913963 | 0.005392 |
| HSP90AA1 | 1.393485 | 1.098737 | 1.767303 | 0.006209 |
| HACD3    | 1.368414 | 1.08981  | 1.718241 | 0.006925 |
| CPT1A    | 1.309823 | 1.075168 | 1.59569  | 0.007373 |
| MBTPS2   | 1.373802 | 1.088722 | 1.733531 | 0.007444 |
| PLA2G2D  | 0.910532 | 0.849869 | 0.975525 | 0.007713 |
| BLVRA    | 0.746433 | 0.601856 | 0.92574  | 0.007758 |
| GPX4     | 0.704881 | 0.54434  | 0.91277  | 0.007999 |
| FAM120B  | 1.487111 | 1.104844 | 2.001639 | 0.008854 |
| SERINC1  | 1.450122 | 1.096436 | 1.917898 | 0.009178 |
| LIPH     | 1.228569 | 1.050879 | 1.436304 | 0.009807 |
| BCHE     | 1.106271 | 1.024478 | 1.194594 | 0.009965 |
| CCNC     | 1.403618 | 1.084254 | 1.81705  | 0.01005  |
| ST3GAL1  | 1.267472 | 1.056893 | 1.520008 | 0.010562 |
| PLPPR1   | 0.935698 | 0.889137 | 0.984697 | 0.010707 |
| CLOCK    | 1.371293 | 1.073866 | 1.751097 | 0.011365 |
| LIPG     | 0.854322 | 0.756254 | 0.965106 | 0.011378 |
| CPNE3    | 1.329076 | 1.062999 | 1.661753 | 0.012561 |
| POMC     | 0.869903 | 0.778783 | 0.971685 | 0.013558 |
| GSTZ1    | 0.734537 | 0.574827 | 0.938619 | 0.013649 |
| GPX1     | 0.733242 | 0.571561 | 0.94066  | 0.014635 |
| STAR     | 0.898639 | 0.824569 | 0.979362 | 0.014887 |
| HACD1    | 0.831262 | 0.716279 | 0.964703 | 0.014972 |
| NR1H3    | 0.732582 | 0.569428 | 0.942484 | 0.015487 |
| CYP4F12  | 0.908685 | 0.840593 | 0.982293 | 0.015974 |
| SLCO1A2  | 0.93699  | 0.888601 | 0.988013 | 0.016141 |
| MTM1     | 1.417765 | 1.066791 | 1.88421  | 0.01615  |

|          |          |          |          |          |
|----------|----------|----------|----------|----------|
| SEC24A   | 1.32303  | 1.050849 | 1.665708 | 0.017218 |
| FIG4     | 1.348232 | 1.054078 | 1.724474 | 0.017343 |
| UGT2B4   | 1.066709 | 1.011338 | 1.12511  | 0.017572 |
| DGKZ     | 0.701612 | 0.523277 | 0.940725 | 0.017868 |
| MMUT     | 1.410104 | 1.058647 | 1.878239 | 0.018793 |
| PLA2G12A | 1.370864 | 1.051187 | 1.787757 | 0.019888 |
| CYP4F11  | 0.9135   | 0.845905 | 0.986496 | 0.021077 |
| ALDH2    | 0.842413 | 0.727601 | 0.97534  | 0.021792 |
| CHUK     | 1.366935 | 1.046323 | 1.785788 | 0.021905 |
| APOA5    | 1.050659 | 1.00698  | 1.096233 | 0.022545 |
| FDX2     | 0.742246 | 0.574495 | 0.958978 | 0.022583 |
| LPAR3    | 0.916073 | 0.849259 | 0.988143 | 0.023288 |
| FUT6     | 0.9328   | 0.878217 | 0.990775 | 0.023745 |
| TSPO     | 0.770905 | 0.615157 | 0.966086 | 0.023846 |
| PTGES    | 0.857142 | 0.749689 | 0.979997 | 0.024094 |
| SMARCD3  | 0.787074 | 0.639183 | 0.969185 | 0.024151 |
| CPTP     | 0.749    | 0.582483 | 0.963121 | 0.024268 |
| GRHPR    | 0.688838 | 0.49795  | 0.952903 | 0.024364 |
| CERS6    | 1.234061 | 1.025255 | 1.485393 | 0.02617  |
| ALOX15B  | 0.904364 | 0.827601 | 0.988247 | 0.026337 |
| B3GALT4  | 0.778768 | 0.624536 | 0.971087 | 0.026384 |
| PRKCQ    | 0.878519 | 0.782521 | 0.986295 | 0.028257 |
| SYNJ1    | 1.303822 | 1.028603 | 1.65268  | 0.028301 |
| FUT7     | 0.901041 | 0.820848 | 0.989069 | 0.028447 |
| MTMR9    | 1.337646 | 1.031127 | 1.735284 | 0.028466 |
| B3GNT2   | 1.342858 | 1.031067 | 1.748934 | 0.028748 |
| ACADVL   | 0.728502 | 0.548447 | 0.967669 | 0.028753 |
| TBL1X    | 1.302631 | 1.027773 | 1.650994 | 0.028778 |
| DGKE     | 1.219805 | 1.02049  | 1.458049 | 0.029051 |
| INPP5F   | 1.34615  | 1.030201 | 1.758996 | 0.029408 |
| ENPP6    | 0.869318 | 0.766342 | 0.986132 | 0.029477 |
| MOGAT2   | 0.918277 | 0.850415 | 0.991555 | 0.02952  |
| PIK3CD   | 0.813612 | 0.675309 | 0.98024  | 0.030013 |
| PLD4     | 0.860493 | 0.750804 | 0.986207 | 0.030804 |
| AHRR     | 1.18191  | 1.015462 | 1.375642 | 0.030921 |
| AGPAT5   | 1.296144 | 1.02362  | 1.641224 | 0.031256 |
| MED23    | 1.335117 | 1.025853 | 1.737614 | 0.031569 |
| HSD17B6  | 1.232273 | 1.018326 | 1.49117  | 0.031825 |
| G0S2     | 0.893775 | 0.806115 | 0.990967 | 0.032987 |
| HPGD     | 0.90267  | 0.82154  | 0.991812 | 0.033083 |
| B3GALT1  | 0.919492 | 0.85114  | 0.993333 | 0.033197 |
| CYP1B1   | 0.853655 | 0.737722 | 0.987808 | 0.033612 |
| HIBCH    | 1.376342 | 1.024713 | 1.848631 | 0.033825 |
| SOCS3    | 0.831459 | 0.700964 | 0.986247 | 0.034095 |
| PRXL2B   | 0.750642 | 0.575205 | 0.979588 | 0.034703 |
| PLA2G2A  | 0.929145 | 0.867814 | 0.99481  | 0.034917 |
| TRADD    | 0.762706 | 0.591406 | 0.983621 | 0.036869 |
| APOD     | 0.90638  | 0.826158 | 0.994391 | 0.037624 |
| PLEKHA3  | 1.416036 | 1.019678 | 1.966462 | 0.037869 |
| FITM1    | 0.868242 | 0.759703 | 0.992287 | 0.038116 |
| ACAD11   | 1.273296 | 1.011962 | 1.602118 | 0.039263 |
| ELOVL6   | 1.20931  | 1.008974 | 1.449424 | 0.039721 |
| B3GNT3   | 0.916267 | 0.842881 | 0.996044 | 0.04007  |
| NFKBIB   | 0.754336 | 0.575925 | 0.988015 | 0.040606 |
| CYP7B1   | 0.859583 | 0.743373 | 0.99396  | 0.04118  |
| SLC10A1  | 1.077008 | 1.002779 | 1.156732 | 0.041737 |
| LTC4S    | 0.958435 | 0.920053 | 0.998419 | 0.041768 |
| MAPK9    | 1.350304 | 1.011131 | 1.803248 | 0.041854 |

|          |          |          |          |          |
|----------|----------|----------|----------|----------|
| PTPRG    | 1.242201 | 1.00694  | 1.53243  | 0.042917 |
| LPAR2    | 0.747974 | 0.564509 | 0.991064 | 0.043127 |
| NBN      | 1.276514 | 1.007256 | 1.617751 | 0.043406 |
| FABP5    | 0.847873 | 0.722066 | 0.995599 | 0.044032 |
| SLC27A6  | 0.93077  | 0.867598 | 0.998543 | 0.045432 |
| MMP1     | 1.08039  | 1.001501 | 1.165493 | 0.045638 |
| APOA1    | 0.931623 | 0.869049 | 0.998703 | 0.045875 |
| CIDEC    | 0.941805 | 0.887806 | 0.999088 | 0.046563 |
| RAB5A    | 1.389684 | 1.004824 | 1.921951 | 0.046695 |
| SEC24C   | 1.235612 | 1.003054 | 1.522089 | 0.046743 |
| PLEKHA4  | 0.853843 | 0.730091 | 0.998573 | 0.047946 |
| S1PR5    | 0.856891 | 0.735192 | 0.998735 | 0.048136 |
| GPS2     | 0.786811 | 0.620135 | 0.998284 | 0.04837  |
| FUT2     | 0.880698 | 0.776277 | 0.999164 | 0.048501 |
| STARD3NL | 1.406268 | 1.001846 | 1.973946 | 0.048767 |
| PPT1     | 1.281348 | 0.999976 | 1.641891 | 0.050022 |
| GLUL     | 0.822355 | 0.676148 | 1.000177 | 0.050208 |
| PTGS2    | 0.897627 | 0.805642 | 1.000114 | 0.050242 |
| GSTM4    | 0.806903 | 0.650514 | 1.00089  | 0.050954 |
| CYP11B1  | 1.039277 | 0.999817 | 1.080294 | 0.051093 |
| HSD11B1  | 0.890485 | 0.792061 | 1.00114  | 0.05227  |
| LCLAT1   | 1.285648 | 0.996607 | 1.658519 | 0.053137 |
| PIK3C2G  | 0.928578 | 0.861356 | 1.001045 | 0.053271 |
| PPARG    | 0.855641 | 0.729334 | 1.003821 | 0.055728 |
| TXNRD1   | 1.22239  | 0.994927 | 1.501855 | 0.055934 |
| SLC44A1  | 1.297622 | 0.991523 | 1.69822  | 0.057703 |
| PTPN13   | 1.162535 | 0.99427  | 1.359277 | 0.059035 |
| PIP4K2C  | 1.266572 | 0.990842 | 1.619032 | 0.059225 |
| SAMD8    | 1.235332 | 0.990592 | 1.540539 | 0.060648 |
| GGT5     | 0.839646 | 0.699014 | 1.00857  | 0.061662 |
| MTMR1    | 1.349474 | 0.985294 | 1.848261 | 0.061812 |
| CYP3A43  | 0.956595 | 0.912921 | 1.002359 | 0.062721 |
| VAPB     | 1.260284 | 0.987606 | 1.608248 | 0.062927 |
| MED13    | 1.203441 | 0.989974 | 1.462937 | 0.063053 |
| ACSM3    | 0.836549 | 0.692873 | 1.010017 | 0.063412 |
| MED14    | 1.258937 | 0.986612 | 1.606429 | 0.064086 |
| ERP29    | 0.765111 | 0.575317 | 1.017519 | 0.065684 |
| SLC44A3  | 0.838782 | 0.695271 | 1.011915 | 0.066321 |
| PCYT1A   | 1.333253 | 0.98057  | 1.812786 | 0.066536 |
| STK11    | 0.783999 | 0.603876 | 1.01785  | 0.067681 |
| RAB14    | 1.343835 | 0.977918 | 1.846672 | 0.068413 |
| GPX6     | 1.057781 | 0.995728 | 1.1237   | 0.06858  |
| ACOT9    | 0.816783 | 0.656907 | 1.01557  | 0.068614 |
| AGPAT1   | 1.40455  | 0.974323 | 2.024752 | 0.068674 |
| ELOVL2   | 0.934697 | 0.868952 | 1.005416 | 0.069553 |
| HCCS     | 1.345401 | 0.976077 | 1.854468 | 0.069974 |
| AGMO     | 0.924816 | 0.849842 | 1.006405 | 0.069994 |
| A4GALT   | 0.841635 | 0.698309 | 1.014377 | 0.070281 |
| UROD     | 0.734857 | 0.526319 | 1.026022 | 0.070433 |
| SAR1B    | 1.311017 | 0.97728  | 1.758723 | 0.070818 |
| ACER2    | 1.134383 | 0.988757 | 1.301457 | 0.072071 |
| SUCLA2   | 1.293004 | 0.977181 | 1.710901 | 0.072112 |
| SDHC     | 1.300137 | 0.97666  | 1.730753 | 0.07215  |
| OXCT1    | 1.186244 | 0.984444 | 1.429412 | 0.072627 |
| MTMR12   | 1.238187 | 0.980262 | 1.563978 | 0.073023 |
| OLAH     | 0.93543  | 0.869419 | 1.006453 | 0.073827 |
| MVD      | 0.826743 | 0.670863 | 1.018842 | 0.074285 |
| S1PR2    | 0.796684 | 0.620603 | 1.022723 | 0.074481 |

|          |          |          |          |          |
|----------|----------|----------|----------|----------|
| SPTLC1   | 1.290459 | 0.974514 | 1.708835 | 0.075112 |
| ADH1C    | 0.941972 | 0.881934 | 1.006097 | 0.075229 |
| CIDEA    | 0.951526 | 0.90056  | 1.005377 | 0.076889 |
| ACOXL    | 1.111404 | 0.988645 | 1.249407 | 0.07694  |
| CPNE6    | 0.963882 | 0.925289 | 1.004085 | 0.07766  |
| STARD10  | 0.861711 | 0.730298 | 1.016771 | 0.077907 |
| CHD9     | 1.213016 | 0.978501 | 1.503735 | 0.078121 |
| AUH      | 1.325371 | 0.96747  | 1.815671 | 0.079424 |
| SUMF1    | 1.295678 | 0.969863 | 1.730947 | 0.07962  |
| IL4I1    | 0.886276 | 0.774232 | 1.014534 | 0.079995 |
| RDH16    | 1.103354 | 0.988115 | 1.232034 | 0.080546 |
| ACSS3    | 1.142943 | 0.982635 | 1.329405 | 0.083137 |
| HSPH1    | 1.198348 | 0.976518 | 1.470569 | 0.083193 |
| GAD2     | 1.03486  | 0.995473 | 1.075806 | 0.083493 |
| PNPLA2   | 0.808267 | 0.634534 | 1.029568 | 0.084714 |
| TGS1     | 1.257755 | 0.968907 | 1.632713 | 0.084945 |
| GPX5     | 1.057708 | 0.99204  | 1.127724 | 0.08624  |
| SULT1E1  | 0.949789 | 0.895409 | 1.007471 | 0.086801 |
| PIK3CA   | 1.239143 | 0.969174 | 1.584313 | 0.087225 |
| NCOA3    | 1.207197 | 0.972718 | 1.498198 | 0.087465 |
| FASN     | 0.886124 | 0.770968 | 1.01848  | 0.088726 |
| PIK3CB   | 1.246365 | 0.966913 | 1.606583 | 0.089092 |
| ACADL    | 0.946359 | 0.88806  | 1.008487 | 0.089231 |
| MED17    | 1.299337 | 0.959836 | 1.758923 | 0.090139 |
| ETNPPL   | 0.957486 | 0.910511 | 1.006885 | 0.090528 |
| PMVK     | 0.812941 | 0.638791 | 1.034568 | 0.092244 |
| PIK3R4   | 1.284242 | 0.959334 | 1.719189 | 0.092763 |
| PRKAG1   | 1.367266 | 0.949318 | 1.969221 | 0.092852 |
| LYPLA1   | 1.202926 | 0.969667 | 1.492297 | 0.092977 |
| HSD3B7   | 0.839313 | 0.683863 | 1.030099 | 0.0937   |
| CDS1     | 1.227257 | 0.964622 | 1.561399 | 0.095556 |
| GLA      | 0.84165  | 0.687101 | 1.030962 | 0.095835 |
| ACSL5    | 0.879117 | 0.755088 | 1.023519 | 0.096839 |
| GDPD5    | 0.849945 | 0.701411 | 1.029933 | 0.097114 |
| HSDL2    | 1.253535 | 0.959322 | 1.63798  | 0.097786 |
| UGT1A8   | 0.909306 | 0.812363 | 1.017818 | 0.098347 |
| FABP4    | 0.944654 | 0.882944 | 1.010678 | 0.098569 |
| CYP4F22  | 0.939429 | 0.872193 | 1.011849 | 0.099131 |
| SLC33A1  | 1.255659 | 0.957357 | 1.64691  | 0.099957 |
| ACOT1    | 0.868936 | 0.73464  | 1.02778  | 0.10099  |
| PLA2G4B  | 0.915389 | 0.823588 | 1.017422 | 0.101082 |
| PNPLA3   | 0.928918 | 0.850546 | 1.014511 | 0.101086 |
| PRKD2    | 0.777686 | 0.573963 | 1.053719 | 0.104731 |
| PIKFYVE  | 1.221267 | 0.958555 | 1.55598  | 0.105781 |
| ADH7     | 0.942118 | 0.876441 | 1.012716 | 0.105827 |
| FITM2    | 1.207234 | 0.96062  | 1.517159 | 0.106232 |
| OSBPL6   | 1.135165 | 0.973033 | 1.324313 | 0.106897 |
| PDPK1    | 1.253623 | 0.952385 | 1.650141 | 0.106953 |
| BCKDHB   | 1.225887 | 0.956056 | 1.571874 | 0.108346 |
| TNFRSF1B | 0.863428 | 0.721484 | 1.033297 | 0.109042 |
| CSNK2A1  | 1.276683 | 0.946771 | 1.721556 | 0.109295 |
| PIK3C2A  | 1.207824 | 0.958374 | 1.522203 | 0.109656 |
| CD1D     | 0.869511 | 0.732354 | 1.032354 | 0.110395 |
| PSME1    | 0.804636 | 0.616026 | 1.050994 | 0.110712 |
| MIGA2    | 0.787455 | 0.586507 | 1.057251 | 0.111923 |
| UGT1A6   | 1.046232 | 0.98949  | 1.106228 | 0.112156 |
| ECI1     | 0.822498 | 0.646126 | 1.047015 | 0.112542 |
| MBOAT7   | 1.228641 | 0.952437 | 1.584943 | 0.112994 |

|           |          |          |          |          |
|-----------|----------|----------|----------|----------|
| B3GALNT1  | 1.185723 | 0.960387 | 1.46393  | 0.11317  |
| CERS2     | 1.222914 | 0.953364 | 1.568675 | 0.113186 |
| MED11     | 0.777152 | 0.56887  | 1.061693 | 0.113221 |
| PRKAA2    | 0.93215  | 0.854259 | 1.017144 | 0.114532 |
| IRS4      | 0.933166 | 0.856122 | 1.017144 | 0.115641 |
| SLCO1B1   | 1.03614  | 0.991305 | 1.083002 | 0.115717 |
| TECRL     | 1.050525 | 0.987782 | 1.117252 | 0.116713 |
| CA2       | 0.922952 | 0.834933 | 1.020249 | 0.116896 |
| ABCC3     | 0.885868 | 0.761335 | 1.030771 | 0.116913 |
| PTPN11    | 1.208549 | 0.953566 | 1.531715 | 0.117184 |
| ALDH1A1   | 0.893649 | 0.776161 | 1.02892  | 0.117928 |
| MED15     | 0.761718 | 0.540694 | 1.073091 | 0.11958  |
| CYP27B1   | 0.894006 | 0.776331 | 1.029517 | 0.119711 |
| HSD17B8   | 0.847673 | 0.687436 | 1.04526  | 0.12213  |
| FUT9      | 1.053469 | 0.986027 | 1.125523 | 0.122805 |
| ABO       | 0.922951 | 0.833493 | 1.022009 | 0.12321  |
| PPP1CA    | 0.807549 | 0.615301 | 1.059862 | 0.12335  |
| PLB1      | 0.865885 | 0.720794 | 1.040182 | 0.123817 |
| FAR1      | 1.202305 | 0.950251 | 1.521217 | 0.124819 |
| PTGDS     | 0.92225  | 0.83168  | 1.022684 | 0.124865 |
| ESYT1     | 1.270397 | 0.934933 | 1.72623  | 0.126046 |
| LEP       | 0.955963 | 0.902219 | 1.012909 | 0.127132 |
| CYP8B1    | 0.943893 | 0.876364 | 1.016625 | 0.127354 |
| CERS1     | 0.929354 | 0.845768 | 1.021201 | 0.127592 |
| INPP4B    | 1.129028 | 0.965348 | 1.32046  | 0.128853 |
| TIAM2     | 1.187546 | 0.950966 | 1.482982 | 0.129414 |
| FABP6     | 1.045986 | 0.986867 | 1.108647 | 0.129871 |
| TNFAIP8   | 0.843383 | 0.676436 | 1.051533 | 0.130158 |
| CDK8      | 1.19844  | 0.946034 | 1.518191 | 0.133563 |
| PLPPR2    | 1.238854 | 0.936265 | 1.639238 | 0.133862 |
| STARD5    | 0.839767 | 0.667845 | 1.055947 | 0.135129 |
| PTGES2    | 0.807565 | 0.609703 | 1.069637 | 0.136093 |
| GK3P      | 1.032265 | 0.990004 | 1.076329 | 0.136504 |
| MED12     | 1.261723 | 0.928875 | 1.713843 | 0.136807 |
| AKR1C3    | 0.890154 | 0.763573 | 1.03772  | 0.137055 |
| MED1      | 1.132768 | 0.960816 | 1.335494 | 0.137781 |
| CYP4A22   | 1.043186 | 0.986438 | 1.103199 | 0.138471 |
| HSD17B2   | 0.946748 | 0.880447 | 1.018042 | 0.139608 |
| MED7      | 1.305161 | 0.916364 | 1.858918 | 0.139962 |
| B4GALT2   | 0.791219 | 0.579062 | 1.081108 | 0.141475 |
| SLC44A2   | 1.2438   | 0.929581 | 1.664231 | 0.141977 |
| SEC23A    | 1.196092 | 0.941291 | 1.519866 | 0.142931 |
| ST6GALNAC | 1.156144 | 0.952002 | 1.40406  | 0.143267 |
| ADIPOR2   | 1.155172 | 0.952196 | 1.401416 | 0.143436 |
| PITPNM1   | 0.865221 | 0.712649 | 1.050456 | 0.143565 |
| MED18     | 1.305122 | 0.913223 | 1.865201 | 0.143824 |
| ADIPOQ    | 0.960681 | 0.910371 | 1.013771 | 0.143852 |
| GLIPR1    | 0.853704 | 0.690024 | 1.05621  | 0.145279 |
| PI4K2B    | 1.213656 | 0.934562 | 1.576097 | 0.146402 |
| ADH1B     | 0.95939  | 0.906995 | 1.014813 | 0.147952 |
| APOC3     | 1.033096 | 0.988426 | 1.079785 | 0.148805 |
| EBP       | 0.82686  | 0.638726 | 1.070408 | 0.148908 |
| ARSF      | 0.964659 | 0.91866  | 1.012961 | 0.148919 |
| PIK3C3    | 1.230467 | 0.927935 | 1.631633 | 0.149732 |
| PLD2      | 0.805695 | 0.599948 | 1.082001 | 0.150975 |
| GPD1L     | 1.163042 | 0.946357 | 1.42934  | 0.151051 |
| ECH1      | 0.819693 | 0.623509 | 1.077605 | 0.154307 |
| HDAC3     | 1.307957 | 0.903409 | 1.893664 | 0.155044 |

|           |          |          |          |          |
|-----------|----------|----------|----------|----------|
| NFYA      | 1.214681 | 0.928808 | 1.588542 | 0.155454 |
| SEC24B    | 1.220345 | 0.926758 | 1.606936 | 0.15612  |
| ANGPTL4   | 0.918178 | 0.815886 | 1.033295 | 0.156636 |
| GPAT2     | 0.913136 | 0.804765 | 1.0361   | 0.158605 |
| MAOA      | 0.922981 | 0.825436 | 1.032052 | 0.159616 |
| CYP3A7    | 1.127292 | 0.953741 | 1.332423 | 0.16011  |
| DPEP1     | 0.921235 | 0.821525 | 1.033046 | 0.160409 |
| ACSL1     | 1.117892 | 0.956768 | 1.306151 | 0.160489 |
| PISD      | 0.839861 | 0.65813  | 1.071774 | 0.160677 |
| ACLY      | 1.188232 | 0.933162 | 1.513022 | 0.161851 |
| CBR4      | 1.204547 | 0.927489 | 1.564368 | 0.16286  |
| SEC24D    | 1.160338 | 0.941498 | 1.430046 | 0.16313  |
| RORA      | 1.175898 | 0.934374 | 1.479853 | 0.167185 |
| NCAPH2    | 0.818903 | 0.616399 | 1.087935 | 0.168061 |
| BAAT      | 1.037631 | 0.98452  | 1.093607 | 0.168209 |
| CYP4F2    | 0.963621 | 0.914136 | 1.015784 | 0.168286 |
| HSD17B3   | 1.069908 | 0.971546 | 1.178229 | 0.169658 |
| TNFRSF1A  | 0.802292 | 0.585791 | 1.098809 | 0.169827 |
| SQLE      | 1.120346 | 0.95247  | 1.317811 | 0.170059 |
| NCOA6     | 1.213229 | 0.918819 | 1.601974 | 0.1729   |
| SGPP1     | 0.890562 | 0.753767 | 1.052182 | 0.173149 |
| PLA2G4F   | 1.09868  | 0.959073 | 1.258608 | 0.174693 |
| ACSF2     | 0.886381 | 0.744697 | 1.055021 | 0.174707 |
| DBI       | 0.846504 | 0.665353 | 1.076975 | 0.174981 |
| NCOR1     | 1.182944 | 0.927871 | 1.508136 | 0.175157 |
| GDE1      | 1.241104 | 0.907712 | 1.696947 | 0.175958 |
| TSPOAP1   | 0.898421 | 0.769117 | 1.049463 | 0.176684 |
| ACBD7     | 1.082012 | 0.964646 | 1.213658 | 0.178452 |
| PHYH      | 1.171772 | 0.929712 | 1.476856 | 0.179383 |
| JAK2      | 0.859333 | 0.688421 | 1.072678 | 0.180283 |
| HSD17B4   | 1.210853 | 0.915125 | 1.602148 | 0.18052  |
| TPTE2     | 1.044777 | 0.979856 | 1.113999 | 0.180816 |
| IRS2      | 0.899813 | 0.770852 | 1.05035  | 0.181038 |
| DPEP3     | 0.966775 | 0.920056 | 1.015866 | 0.181205 |
| ESRRA     | 0.848633 | 0.666599 | 1.080378 | 0.182739 |
| SIN3B     | 0.806149 | 0.586973 | 1.107166 | 0.183155 |
| HACD2     | 1.168059 | 0.929126 | 1.468436 | 0.183388 |
| FDXR      | 0.867717 | 0.704016 | 1.069482 | 0.183449 |
| TNFAIP8L1 | 0.831112 | 0.632292 | 1.09245  | 0.184805 |
| DGKA      | 0.858942 | 0.685712 | 1.075933 | 0.185799 |
| GGPS1     | 1.227806 | 0.905443 | 1.664941 | 0.186592 |
| UGT2B10   | 1.031627 | 0.984965 | 1.080499 | 0.187337 |
| FAAH2     | 1.173567 | 0.92439  | 1.489912 | 0.188737 |
| HADHB     | 1.272234 | 0.887101 | 1.824571 | 0.190608 |
| NUDT19    | 1.159052 | 0.928316 | 1.447139 | 0.192501 |
| LHB       | 0.964051 | 0.91232  | 1.018716 | 0.193255 |
| AKR1D1    | 0.959859 | 0.902408 | 1.020968 | 0.193256 |
| CSNK1G2   | 0.818833 | 0.605751 | 1.106871 | 0.193701 |
| MTMR2     | 1.177715 | 0.920251 | 1.507211 | 0.193723 |
| LCAT      | 0.872529 | 0.71025  | 1.071886 | 0.194024 |
| ACHE      | 0.919328 | 0.809728 | 1.043764 | 0.194067 |
| SGMS2     | 1.106239 | 0.94979  | 1.288459 | 0.194355 |
| CYP2C9    | 1.028385 | 0.98582  | 1.072788 | 0.194357 |
| ACSL6     | 0.924723 | 0.821606 | 1.040781 | 0.19451  |
| OXCT2     | 0.958454 | 0.898927 | 1.021923 | 0.194608 |
| GPX7      | 0.885772 | 0.737044 | 1.064512 | 0.195888 |
| GDPD1     | 1.121158 | 0.94254  | 1.333625 | 0.196492 |
| CPNE7     | 0.933805 | 0.841403 | 1.036355 | 0.197658 |

|          |          |          |          |          |
|----------|----------|----------|----------|----------|
| GPD1     | 0.952278 | 0.883965 | 1.02587  | 0.197928 |
| UGT1A1   | 1.048892 | 0.975239 | 1.128106 | 0.198789 |
| SELENOI  | 1.160398 | 0.924784 | 1.456041 | 0.198902 |
| GAL3ST1  | 0.951574 | 0.881931 | 1.026717 | 0.200531 |
| SP1      | 1.228415 | 0.894269 | 1.687416 | 0.20406  |
| CYP2A13  | 1.03361  | 0.982098 | 1.087823 | 0.205009 |
| ACER3    | 1.139774 | 0.929819 | 1.397138 | 0.207861 |
| DECR2    | 0.857463 | 0.674921 | 1.089377 | 0.208008 |
| LRP2     | 1.043956 | 0.976313 | 1.116286 | 0.208174 |
| PLPP2    | 1.141933 | 0.928591 | 1.40429  | 0.208454 |
| MTMR8    | 0.926243 | 0.821552 | 1.044275 | 0.210563 |
| DHRS7B   | 0.845327 | 0.649776 | 1.09973  | 0.210654 |
| ETFDH    | 1.195978 | 0.902248 | 1.585332 | 0.213281 |
| PPARGC1A | 0.927326 | 0.823007 | 1.044868 | 0.215294 |
| GPCPD1   | 0.862138 | 0.681621 | 1.090463 | 0.215902 |
| LPCAT1   | 1.156729 | 0.917962 | 1.4576   | 0.217093 |
| CPT1B    | 0.887682 | 0.734532 | 1.072763 | 0.217559 |
| UGT8     | 0.94101  | 0.854149 | 1.036703 | 0.218513 |
| CYP2C18  | 1.027189 | 0.984214 | 1.072041 | 0.218602 |
| GPAM     | 1.122798 | 0.933564 | 1.350389 | 0.218716 |
| AWAT2    | 0.96898  | 0.921271 | 1.01916  | 0.221243 |
| APOA2    | 1.030304 | 0.982111 | 1.080861 | 0.221922 |
| LYPLA2   | 0.829315 | 0.613484 | 1.121079 | 0.223659 |
| GDPD3    | 1.077316 | 0.955495 | 1.214668 | 0.22384  |
| SBF2     | 1.13209  | 0.926604 | 1.383145 | 0.224737 |
| NDUFAB1  | 1.221907 | 0.884041 | 1.688901 | 0.224898 |
| RAP1GDS1 | 1.14598  | 0.919488 | 1.428262 | 0.225191 |
| DHCR24   | 1.132398 | 0.92621  | 1.384486 | 0.22533  |
| KPNB1    | 1.191974 | 0.897319 | 1.583386 | 0.225461 |
| PLIN1    | 0.951084 | 0.87688  | 1.031568 | 0.226251 |
| PCCA     | 1.155418 | 0.914347 | 1.460047 | 0.226291 |
| ACOX2    | 1.06582  | 0.960971 | 1.182108 | 0.227634 |
| OSBP     | 1.188561 | 0.897453 | 1.574097 | 0.228147 |
| OSBPL2   | 1.186469 | 0.897991 | 1.56762  | 0.22899  |
| MTF1     | 1.164689 | 0.907322 | 1.495059 | 0.231463 |
| SRD5A2   | 0.943523 | 0.857222 | 1.038513 | 0.234905 |
| MTMR10   | 1.187196 | 0.893085 | 1.578163 | 0.237427 |
| PIP5K1B  | 0.936731 | 0.840365 | 1.044146 | 0.237991 |
| GLB1     | 1.195259 | 0.888601 | 1.607744 | 0.238335 |
| ARF3     | 1.20252  | 0.884528 | 1.634831 | 0.239229 |
| AKR1C1   | 0.942628 | 0.854107 | 1.040323 | 0.240282 |
| INPP4A   | 1.196435 | 0.885868 | 1.615882 | 0.242151 |
| PIK3C2B  | 1.174971 | 0.896148 | 1.540545 | 0.243362 |
| DECR1    | 1.171808 | 0.895315 | 1.533688 | 0.248233 |
| AGPAT3   | 1.188345 | 0.885574 | 1.594631 | 0.250113 |
| PLA2G1B  | 0.966955 | 0.913118 | 1.023966 | 0.250276 |
| B4GALT6  | 1.104281 | 0.932275 | 1.308022 | 0.250879 |
| PCK1     | 0.966894 | 0.912866 | 1.024119 | 0.25114  |
| PLPPR3   | 0.960116 | 0.895443 | 1.02946  | 0.252652 |
| DGKB     | 1.043303 | 0.970135 | 1.121989 | 0.253172 |
| PLEKHA6  | 1.136719 | 0.911958 | 1.416875 | 0.254266 |
| MAPK10   | 1.080448 | 0.945505 | 1.23465  | 0.255648 |
| HACD4    | 1.099736 | 0.93332  | 1.295826 | 0.256103 |
| SMS      | 1.18347  | 0.884493 | 1.583507 | 0.256872 |
| S1PR1    | 0.90593  | 0.763617 | 1.074764 | 0.257195 |
| FDPS     | 0.850914 | 0.643552 | 1.125091 | 0.257261 |
| IDI2     | 1.022184 | 0.984097 | 1.061746 | 0.257418 |
| PLA2G2C  | 0.964398 | 0.905674 | 1.026929 | 0.258073 |

|          |          |          |          |          |
|----------|----------|----------|----------|----------|
| AWAT1    | 0.974083 | 0.930613 | 1.019585 | 0.259616 |
| ME1      | 1.073065 | 0.948977 | 1.213378 | 0.260714 |
| ACOX1    | 1.172989 | 0.887393 | 1.5505   | 0.262383 |
| HAO2     | 0.95883  | 0.890832 | 1.032018 | 0.262628 |
| COMT     | 0.859848 | 0.660208 | 1.119858 | 0.262635 |
| MIGA1    | 1.127384 | 0.913844 | 1.390823 | 0.263111 |
| GBGT1    | 0.882643 | 0.709189 | 1.098522 | 0.263464 |
| EP300    | 1.151541 | 0.899163 | 1.474758 | 0.263621 |
| PLPPR4   | 1.09387  | 0.934043 | 1.281045 | 0.265578 |
| SORBS1   | 0.915585 | 0.783641 | 1.069746 | 0.266662 |
| PTEN     | 1.175816 | 0.88274  | 1.566196 | 0.268177 |
| SUCLG2   | 1.166784 | 0.887419 | 1.534096 | 0.269317 |
| DDHD1    | 1.165298 | 0.887841 | 1.529462 | 0.270218 |
| ACSL4    | 0.908119 | 0.764815 | 1.078274 | 0.271371 |
| MED26    | 0.827027 | 0.589187 | 1.160875 | 0.272321 |
| PLPPR5   | 1.038867 | 0.97039  | 1.112177 | 0.273072 |
| CPOX     | 1.166894 | 0.884613 | 1.53925  | 0.274703 |
| SLC2A1   | 1.121251 | 0.912962 | 1.37706  | 0.275058 |
| PTPMT1   | 0.851346 | 0.637652 | 1.136655 | 0.275118 |
| PTGR1    | 1.137111 | 0.901839 | 1.433759 | 0.277304 |
| MOGAT3   | 1.02093  | 0.983421 | 1.05987  | 0.278095 |
| BMX      | 0.945779 | 0.855066 | 1.046115 | 0.278535 |
| PLIN3    | 0.840787 | 0.614248 | 1.150873 | 0.278955 |
| TRAF2    | 0.853861 | 0.641335 | 1.136813 | 0.27931  |
| CERS4    | 1.121528 | 0.911091 | 1.380571 | 0.279364 |
| PON1     | 0.963907 | 0.901749 | 1.03035  | 0.279762 |
| PECR     | 1.129058 | 0.905803 | 1.407339 | 0.280214 |
| DEGS2    | 1.074713 | 0.94236  | 1.225655 | 0.282565 |
| MVK      | 0.85699  | 0.64607  | 1.136769 | 0.284327 |
| CYP21A2  | 0.947381 | 0.858002 | 1.046071 | 0.285021 |
| SLC25A1  | 0.871164 | 0.674827 | 1.124624 | 0.289801 |
| METAP1   | 1.177601 | 0.869563 | 1.594761 | 0.290685 |
| TMEM86B  | 0.896971 | 0.733122 | 1.097441 | 0.290739 |
| LEPR     | 1.082832 | 0.934068 | 1.255289 | 0.291243 |
| ST8SIA1  | 0.9257   | 0.801862 | 1.068664 | 0.292044 |
| ACER1    | 1.037985 | 0.96821  | 1.112788 | 0.293699 |
| PRKD1    | 1.099122 | 0.921153 | 1.311477 | 0.294326 |
| ARSI     | 0.933416 | 0.820174 | 1.062293 | 0.296393 |
| LPAR1    | 1.121669 | 0.904038 | 1.391691 | 0.296814 |
| B4GALT1  | 0.888098 | 0.71057  | 1.109981 | 0.29697  |
| LSS      | 1.14744  | 0.885942 | 1.486124 | 0.297303 |
| APEX1    | 0.842811 | 0.610786 | 1.162979 | 0.297906 |
| SC5D     | 1.117799 | 0.906327 | 1.378614 | 0.297986 |
| GBA2     | 0.844055 | 0.613014 | 1.162174 | 0.298827 |
| NAGA     | 0.852566 | 0.630191 | 1.153409 | 0.300949 |
| CHPT1    | 0.918179 | 0.780947 | 1.079526 | 0.301367 |
| CYP4F8   | 0.971549 | 0.919757 | 1.026257 | 0.301755 |
| SBF1     | 0.872026 | 0.672374 | 1.130962 | 0.301956 |
| PRKAG3   | 0.973984 | 0.926254 | 1.024175 | 0.303853 |
| SMPD1    | 1.165393 | 0.87012  | 1.560865 | 0.304554 |
| SLC25A17 | 1.169164 | 0.865643 | 1.579108 | 0.308142 |
| HMGCR    | 1.136658 | 0.888254 | 1.454528 | 0.308624 |
| GLYCTK   | 0.880617 | 0.689437 | 1.124812 | 0.308638 |
| ASAH2    | 1.071214 | 0.937848 | 1.223547 | 0.310549 |
| UGT2A1   | 0.96588  | 0.903136 | 1.032983 | 0.311045 |
| RXRG     | 1.049578 | 0.9557   | 1.152677 | 0.311461 |
| INPP5D   | 0.911889 | 0.76228  | 1.090861 | 0.313071 |
| MCAT     | 0.862048 | 0.64558  | 1.1511   | 0.314335 |



|           |          |          |          |          |
|-----------|----------|----------|----------|----------|
| PLA2G4A   | 0.927009 | 0.799412 | 1.074972 | 0.315798 |
| TNFAIP8L2 | 0.907453 | 0.750169 | 1.097713 | 0.317318 |
| UGT2A3    | 1.020565 | 0.980634 | 1.062121 | 0.317483 |
| ST3GAL2   | 0.877529 | 0.679178 | 1.133806 | 0.317623 |
| SLC2A4    | 0.939681 | 0.831407 | 1.062054 | 0.319215 |
| PPM1L     | 1.111222 | 0.90218  | 1.3687   | 0.321281 |
| NR1D1     | 1.102297 | 0.909111 | 1.336535 | 0.32183  |
| ACACA     | 1.114691 | 0.899124 | 1.381942 | 0.322071 |
| GC        | 1.030661 | 0.970612 | 1.094427 | 0.324106 |
| LPGAT1    | 1.125428 | 0.889807 | 1.42344  | 0.324195 |
| FABP12    | 0.95686  | 0.876128 | 1.045031 | 0.326807 |
| ADIPOR1   | 1.156608 | 0.864686 | 1.547084 | 0.326923 |
| FUT4      | 1.114265 | 0.897237 | 1.383788 | 0.327633 |
| INPP5J    | 1.076032 | 0.928411 | 1.247126 | 0.330385 |
| ACSF3     | 0.865063 | 0.645838 | 1.158702 | 0.330997 |
| PNLIP     | 0.975304 | 0.926731 | 1.026423 | 0.337366 |
| DGKQ      | 0.864284 | 0.641351 | 1.164708 | 0.337938 |
| CDIPT     | 1.169334 | 0.848994 | 1.610545 | 0.338199 |
| SLC27A2   | 0.956523 | 0.873278 | 1.047703 | 0.338646 |
| CYP4F3    | 0.9688   | 0.907748 | 1.033959 | 0.339879 |
| PIP4K2B   | 1.130882 | 0.87744  | 1.457529 | 0.342082 |
| ALAD      | 1.16047  | 0.850582 | 1.583259 | 0.347759 |
| OSBPL8    | 1.095053 | 0.905704 | 1.323988 | 0.34853  |
| STS       | 0.916218 | 0.762491 | 1.100938 | 0.350423 |
| ARNT2     | 1.066223 | 0.931814 | 1.220021 | 0.350969 |
| MAPKAPK2  | 0.884027 | 0.682277 | 1.145434 | 0.351008 |
| OLR1      | 1.076572 | 0.921642 | 1.257546 | 0.35202  |
| PTS       | 1.161476 | 0.846198 | 1.594222 | 0.35423  |
| GPD2      | 1.099127 | 0.899872 | 1.342503 | 0.354365 |
| IDII      | 1.116205 | 0.884094 | 1.409254 | 0.355355 |
| FAAH      | 0.898841 | 0.716874 | 1.126996 | 0.35545  |
| PI4KA     | 1.127796 | 0.873195 | 1.45663  | 0.356914 |
| PLAAT3    | 1.084861 | 0.912241 | 1.290147 | 0.356958 |
| LCN12     | 0.945953 | 0.840122 | 1.065116 | 0.358693 |
| DLD       | 1.140814 | 0.860231 | 1.512916 | 0.360362 |
| STARD7    | 1.150264 | 0.851693 | 1.553502 | 0.361237 |
| MTMR3     | 0.878755 | 0.665394 | 1.160531 | 0.362389 |
| PLPP6     | 1.133306 | 0.865078 | 1.484702 | 0.363801 |
| ACAT1     | 1.119556 | 0.877261 | 1.428772 | 0.364101 |
| PLEKHA5   | 1.130665 | 0.866853 | 1.474765 | 0.36498  |
| PEX11A    | 1.106374 | 0.888822 | 1.377176 | 0.365508 |
| ABCA1     | 1.094811 | 0.899697 | 1.332239 | 0.365722 |
| AQP7      | 0.96538  | 0.894187 | 1.04224  | 0.367344 |
| MBOAT2    | 1.083477 | 0.909787 | 1.290328 | 0.368448 |
| GLB1L     | 1.12523  | 0.870008 | 1.455322 | 0.368668 |
| AKR1B1    | 0.906677 | 0.731831 | 1.123297 | 0.370106 |
| ST6GALNAC | 1.047802 | 0.945993 | 1.160568 | 0.370592 |
| UBC       | 0.85315  | 0.602598 | 1.207878 | 0.370628 |
| UGCG      | 0.926865 | 0.78478  | 1.094674 | 0.371036 |
| MED20     | 1.149252 | 0.847264 | 1.558875 | 0.371123 |
| DPEP2     | 0.921921 | 0.770887 | 1.102547 | 0.373169 |
| PRDX6     | 1.149706 | 0.845209 | 1.563903 | 0.374175 |
| SLC22A5   | 1.117758 | 0.874291 | 1.429026 | 0.374452 |
| CYP46A1   | 1.092059 | 0.899146 | 1.326361 | 0.374543 |
| MMAA      | 1.155034 | 0.840255 | 1.587735 | 0.374633 |
| LPL       | 0.948641 | 0.844208 | 1.065992 | 0.375598 |
| CRLS1     | 1.163944 | 0.831906 | 1.628509 | 0.375638 |
| AKR1C2    | 0.959522 | 0.875536 | 1.051564 | 0.376623 |

|          |          |          |          |          |
|----------|----------|----------|----------|----------|
| NCOR2    | 0.881734 | 0.666418 | 1.166617 | 0.378251 |
| RAB4A    | 1.14253  | 0.846073 | 1.542863 | 0.384644 |
| HSD3B1   | 0.981329 | 0.940381 | 1.02406  | 0.386113 |
| AGT      | 0.960537 | 0.876937 | 1.052106 | 0.386137 |
| ARV1     | 1.128759 | 0.858264 | 1.484504 | 0.386216 |
| PLA2G2F  | 1.020806 | 0.974172 | 1.069672 | 0.388053 |
| PIP5K1A  | 1.133914 | 0.851176 | 1.510569 | 0.39044  |
| SACM1L   | 1.135275 | 0.848877 | 1.5183   | 0.392345 |
| MCEE     | 1.137919 | 0.846238 | 1.530137 | 0.392519 |
| AKT2     | 0.868113 | 0.627585 | 1.200825 | 0.392882 |
| PON3     | 1.032624 | 0.959132 | 1.111748 | 0.394072 |
| HSD3B2   | 1.018562 | 0.976257 | 1.062699 | 0.395467 |
| PIK3R2   | 0.901113 | 0.708497 | 1.146094 | 0.396089 |
| CEPT1    | 1.117579 | 0.864332 | 1.445028 | 0.396494 |
| SULT2B1  | 1.056627 | 0.930105 | 1.200359 | 0.397292 |
| VAPA     | 1.151195 | 0.83082  | 1.59511  | 0.397471 |
| HMGCS1   | 1.096896 | 0.885192 | 1.359232 | 0.397932 |
| SPTSSA   | 1.119345 | 0.861219 | 1.454836 | 0.399269 |
| RUFY1    | 1.164937 | 0.815156 | 1.664808 | 0.402    |
| SREBF2   | 0.906505 | 0.720296 | 1.140851 | 0.402755 |
| ARSB     | 1.099884 | 0.879287 | 1.375826 | 0.404512 |
| SLC44A5  | 1.038028 | 0.950652 | 1.133435 | 0.405453 |
| LIPE     | 0.947766 | 0.835072 | 1.07567  | 0.406198 |
| FUT5     | 0.981688 | 0.939717 | 1.025533 | 0.407086 |
| FDFT1    | 1.116958 | 0.858996 | 1.452388 | 0.409058 |
| ALAS1    | 1.143885 | 0.831259 | 1.574085 | 0.409189 |
| AGPAT2   | 0.914911 | 0.740441 | 1.130491 | 0.410064 |
| HSD17B14 | 0.928955 | 0.778524 | 1.108452 | 0.413575 |
| AKT1     | 0.879055 | 0.645208 | 1.197656 | 0.413969 |
| ACOT13   | 1.128445 | 0.844283 | 1.508248 | 0.414274 |
| MOGAT1   | 0.982243 | 0.940659 | 1.025665 | 0.416916 |
| PCCB     | 1.123422 | 0.847132 | 1.489825 | 0.419053 |
| INMT     | 0.953041 | 0.847824 | 1.071316 | 0.420343 |
| TECR     | 0.886609 | 0.66107  | 1.189095 | 0.421643 |
| ACP6     | 0.908468 | 0.718728 | 1.148298 | 0.421914 |
| CYP3A4   | 0.975484 | 0.917993 | 1.036576 | 0.423197 |
| MTMR6    | 1.107219 | 0.862514 | 1.421351 | 0.424126 |
| ALDH7A1  | 1.113874 | 0.854895 | 1.451306 | 0.424426 |
| PLA2G3   | 1.021428 | 0.969641 | 1.07598  | 0.424495 |
| B3GALT5  | 0.970065 | 0.900176 | 1.045379 | 0.425647 |
| SPTLC2   | 1.102126 | 0.867425 | 1.40033  | 0.426097 |
| SCD5     | 0.942569 | 0.814288 | 1.091059 | 0.428125 |
| SPTLC3   | 1.066173 | 0.90974  | 1.249504 | 0.428665 |
| SREBF1   | 0.931772 | 0.782131 | 1.110041 | 0.428846 |
| PLAAT2   | 1.045664 | 0.935496 | 1.168806 | 0.431814 |
| ABCD1    | 1.106167 | 0.859698 | 1.423297 | 0.432726 |
| LBR      | 0.921579 | 0.751199 | 1.130601 | 0.433608 |
| PI4K2A   | 1.157944 | 0.801465 | 1.672978 | 0.434732 |
| LIPF     | 0.978088 | 0.925045 | 1.034172 | 0.436082 |
| ARNTL    | 1.112667 | 0.849213 | 1.457853 | 0.438699 |
| GCNT2    | 0.949902 | 0.833935 | 1.081995 | 0.43912  |
| B3GALT2  | 1.052365 | 0.924641 | 1.197733 | 0.439436 |
| ALPI     | 0.978397 | 0.925618 | 1.034185 | 0.440163 |
| CYP2U1   | 1.082897 | 0.884345 | 1.326027 | 0.440923 |
| TDO2     | 1.045875 | 0.932694 | 1.17279  | 0.442739 |
| ADPRM    | 0.879721 | 0.633464 | 1.22171  | 0.444375 |
| ORMDL3   | 1.070655 | 0.898653 | 1.275578 | 0.444833 |
| SDHA     | 1.129714 | 0.825903 | 1.545284 | 0.445382 |

|          |          |          |          |          |
|----------|----------|----------|----------|----------|
| CREBBP   | 1.119919 | 0.836822 | 1.498788 | 0.4462   |
| PITPNM3  | 1.066593 | 0.903081 | 1.259712 | 0.44767  |
| TP53INP2 | 1.086589 | 0.876851 | 1.346494 | 0.447893 |
| CROT     | 0.929385 | 0.768842 | 1.123452 | 0.449124 |
| PNPLA7   | 0.927701 | 0.763601 | 1.127068 | 0.449897 |
| CTSA     | 1.11835  | 0.835012 | 1.497831 | 0.453031 |
| PLTP     | 0.930413 | 0.770254 | 1.123873 | 0.454256 |
| ARF1     | 1.128725 | 0.821457 | 1.550926 | 0.45514  |
| TNF      | 0.952509 | 0.838226 | 1.082374 | 0.455595 |
| RELA     | 0.882187 | 0.634662 | 1.226249 | 0.455634 |
| LGALS1   | 0.916889 | 0.729935 | 1.151728 | 0.455795 |
| CYP39A1  | 0.960817 | 0.86489  | 1.067385 | 0.456383 |
| PLBD1    | 0.938421 | 0.793672 | 1.10957  | 0.45714  |
| PLA2G6   | 0.919124 | 0.73565  | 1.148358 | 0.457891 |
| INPP5K   | 0.885114 | 0.641252 | 1.221714 | 0.457993 |
| MED21    | 1.114858 | 0.836217 | 1.486346 | 0.458705 |
| AMACR    | 1.101232 | 0.853223 | 1.421332 | 0.458879 |
| LIPA     | 1.085762 | 0.873314 | 1.349892 | 0.458909 |
| CYP3A5   | 1.071373 | 0.892184 | 1.286552 | 0.460348 |
| HEXA     | 0.889656 | 0.651121 | 1.215577 | 0.46285  |
| NFYB     | 1.126866 | 0.818211 | 1.551956 | 0.464544 |
| ARSK     | 1.097559 | 0.85502  | 1.408899 | 0.465009 |
| PPARGC1B | 0.937283 | 0.787047 | 1.116195 | 0.467424 |
| CYP2F1   | 0.980412 | 0.929335 | 1.034296 | 0.468647 |
| YWHAH    | 0.893726 | 0.659141 | 1.211797 | 0.469499 |
| DGAT2    | 0.954291 | 0.840537 | 1.083441 | 0.470016 |
| AKR1A1   | 0.886799 | 0.639826 | 1.229104 | 0.470695 |
| NTHL1    | 0.922621 | 0.74107  | 1.148651 | 0.471304 |
| UROS     | 0.886669 | 0.639156 | 1.23003  | 0.471374 |
| UGDH     | 0.939557 | 0.792859 | 1.113398 | 0.471643 |
| ARSJ     | 1.056088 | 0.910139 | 1.22544  | 0.472053 |
| HEXB     | 1.122251 | 0.819161 | 1.537484 | 0.472716 |
| ACSBG1   | 0.941056 | 0.796507 | 1.111837 | 0.475219 |
| ANKRD1   | 0.970983 | 0.895501 | 1.052828 | 0.475744 |
| CA4      | 0.980425 | 0.928445 | 1.035314 | 0.476897 |
| ORMDL1   | 1.123263 | 0.814717 | 1.548658 | 0.478083 |
| S100A10  | 0.927947 | 0.754622 | 1.141082 | 0.478396 |
| PIK3R6   | 0.934341 | 0.774296 | 1.127468 | 0.478671 |
| MDH1     | 1.135095 | 0.799061 | 1.612443 | 0.479252 |
| SCD      | 1.046876 | 0.921889 | 1.188807 | 0.480067 |
| GK2      | 1.035953 | 0.939056 | 1.142849 | 0.480823 |
| ALB      | 1.027641 | 0.952468 | 1.108748 | 0.481752 |
| GRHL1    | 1.063521 | 0.894842 | 1.263996 | 0.484581 |
| MTMR4    | 1.090236 | 0.854447 | 1.391093 | 0.487155 |
| MID1IP1  | 1.085175 | 0.861598 | 1.366769 | 0.487414 |
| FUT3     | 0.973178 | 0.900846 | 1.051318 | 0.490216 |
| ACADM    | 0.922327 | 0.732995 | 1.160562 | 0.490357 |
| GGT1     | 1.041323 | 0.927294 | 1.169373 | 0.493787 |
| GBA      | 1.091285 | 0.849495 | 1.401894 | 0.494245 |
| PPP1CC   | 1.114941 | 0.814558 | 1.526095 | 0.496935 |
| FHL2     | 1.052711 | 0.907663 | 1.220939 | 0.497059 |
| LCN15    | 1.013821 | 0.974354 | 1.054887 | 0.49806  |
| SIN3A    | 1.10855  | 0.822519 | 1.494047 | 0.498537 |
| PTGR2    | 1.095285 | 0.84077  | 1.426846 | 0.499965 |
| LTA4H    | 0.899338 | 0.660326 | 1.224862 | 0.500866 |
| TRIB3    | 1.074361 | 0.871862 | 1.323894 | 0.500872 |
| FABP1    | 1.015537 | 0.970939 | 1.062182 | 0.501039 |
| HADH     | 0.908675 | 0.687074 | 1.201748 | 0.501932 |

|           |          |          |          |          |
|-----------|----------|----------|----------|----------|
| NEU2      | 0.965428 | 0.870792 | 1.07035  | 0.503877 |
| GALC      | 1.088294 | 0.848052 | 1.396593 | 0.506134 |
| ARSA      | 0.923013 | 0.728635 | 1.169246 | 0.506692 |
| CARM1     | 1.103472 | 0.824973 | 1.475988 | 0.50703  |
| CDS2      | 1.102228 | 0.825973 | 1.47088  | 0.508492 |
| AGPAT4    | 0.934405 | 0.763254 | 1.143934 | 0.51102  |
| PTDSS2    | 0.90953  | 0.68486  | 1.207905 | 0.512412 |
| PLEKHA8   | 1.084353 | 0.850413 | 1.382647 | 0.513665 |
| BDH1      | 1.082067 | 0.853034 | 1.372594 | 0.515694 |
| ADH1A     | 0.985462 | 0.94279  | 1.030066 | 0.516737 |
| NRF1      | 0.872404 | 0.57683  | 1.319432 | 0.517828 |
| ALOX12B   | 0.981051 | 0.925739 | 1.039667 | 0.518186 |
| RETSAT    | 1.098274 | 0.825578 | 1.461044 | 0.519753 |
| ACBD4     | 0.9325   | 0.753209 | 1.154468 | 0.521204 |
| PRKAG2    | 0.904604 | 0.665903 | 1.228869 | 0.521246 |
| ARSD      | 1.079552 | 0.854351 | 1.364114 | 0.521358 |
| SLC27A1   | 0.916676 | 0.701506 | 1.197843 | 0.523863 |
| IDH3G     | 0.898542 | 0.645512 | 1.250755 | 0.526083 |
| REEP6     | 0.963288 | 0.85809  | 1.081383 | 0.526138 |
| GPAT4     | 1.06967  | 0.868419 | 1.317559 | 0.526526 |
| NEU1      | 1.092658 | 0.829896 | 1.438616 | 0.527777 |
| CAV1      | 0.946038 | 0.796254 | 1.123997 | 0.528179 |
| TM7SF2    | 0.948814 | 0.805518 | 1.117601 | 0.529359 |
| NR1H2     | 0.898235 | 0.642865 | 1.255047 | 0.529443 |
| SRD5A3    | 1.078982 | 0.851308 | 1.367544 | 0.52957  |
| SLC10A2   | 1.020639 | 0.957175 | 1.088312 | 0.532824 |
| ESYT2     | 1.092637 | 0.826592 | 1.444311 | 0.533756 |
| PGS1      | 0.918362 | 0.702227 | 1.201019 | 0.533907 |
| BMPR1B    | 1.018768 | 0.960399 | 1.080684 | 0.536792 |
| PLA2G4D   | 0.97974  | 0.918089 | 1.04553  | 0.537069 |
| HSD17B7   | 0.927068 | 0.728362 | 1.179983 | 0.538363 |
| NPAS2     | 0.953811 | 0.820318 | 1.109029 | 0.538733 |
| TNFRSF21  | 1.057798 | 0.884057 | 1.265684 | 0.539351 |
| CERK      | 1.077668 | 0.848475 | 1.368771 | 0.539801 |
| ACOX3     | 1.073697 | 0.854782 | 1.348676 | 0.541054 |
| GPX3      | 0.957733 | 0.833833 | 1.100043 | 0.541207 |
| RXRΒ      | 0.899057 | 0.638549 | 1.265843 | 0.542155 |
| GABARAPL1 | 1.077626 | 0.846265 | 1.37224  | 0.544327 |
| MIF       | 0.945819 | 0.789934 | 1.132467 | 0.544384 |
| PSAP      | 1.085256 | 0.832357 | 1.414994 | 0.545571 |
| HSD17B1   | 0.946461 | 0.791563 | 1.131669 | 0.546208 |
| PEMT      | 0.925659 | 0.719983 | 1.190089 | 0.54681  |
| FABP9     | 1.015199 | 0.966544 | 1.066304 | 0.547185 |
| MGLL      | 1.052727 | 0.890394 | 1.244656 | 0.547606 |
| MED31     | 1.107299 | 0.794109 | 1.544007 | 0.547921 |
| ILK       | 1.078215 | 0.840184 | 1.383682 | 0.55404  |
| ORMDL2    | 1.09037  | 0.818501 | 1.452541 | 0.55435  |
| ENO3      | 0.940657 | 0.767295 | 1.153189 | 0.556124 |
| DDHD2     | 1.052333 | 0.88685  | 1.248693 | 0.55898  |
| CSNK2B    | 0.909468 | 0.661454 | 1.250476 | 0.559148 |
| PLD3      | 0.914769 | 0.678256 | 1.233757 | 0.55945  |
| DGKH      | 1.0553   | 0.880723 | 1.264483 | 0.559643 |
| INPP5E    | 0.917008 | 0.683399 | 1.230471 | 0.563593 |
| PNPLA8    | 1.086954 | 0.815934 | 1.447995 | 0.56881  |
| PIP4K2A   | 1.084858 | 0.819671 | 1.43584  | 0.569003 |
| CH25H     | 0.961934 | 0.841446 | 1.099675 | 0.569767 |
| ACOT11    | 1.047    | 0.891848 | 1.229143 | 0.574626 |
| LPAR5     | 1.05787  | 0.868185 | 1.288998 | 0.576856 |

|              |          |          |          |          |
|--------------|----------|----------|----------|----------|
| SUMF2        | 0.922754 | 0.694879 | 1.225359 | 0.578524 |
| PPP1CB       | 1.087667 | 0.808295 | 1.463599 | 0.579017 |
| SCAP         | 0.911824 | 0.657921 | 1.263713 | 0.579336 |
| FH           | 1.08499  | 0.813097 | 1.4478   | 0.579437 |
| AHR          | 0.947646 | 0.783174 | 1.146657 | 0.580335 |
| AOC3         | 0.95812  | 0.822421 | 1.116209 | 0.582965 |
| PLA2G10      | 0.971856 | 0.87735  | 1.076541 | 0.584418 |
| CYP2A7       | 1.019198 | 0.951936 | 1.091211 | 0.585137 |
| LIPC         | 1.036072 | 0.91176  | 1.177334 | 0.586853 |
| HMGCL        | 0.918703 | 0.67501  | 1.250376 | 0.589775 |
| CHKA         | 0.928105 | 0.707559 | 1.217396 | 0.589912 |
| CYP4A11      | 0.983683 | 0.926312 | 1.044607 | 0.591548 |
| VNN1         | 0.958891 | 0.822164 | 1.118355 | 0.592771 |
| ST3GAL4      | 0.937734 | 0.740709 | 1.187165 | 0.593176 |
| LDHA         | 1.070591 | 0.833465 | 1.375181 | 0.593365 |
| FDX1         | 0.921577 | 0.682424 | 1.244541 | 0.594183 |
| ABHD5        | 1.07294  | 0.827679 | 1.390878 | 0.594952 |
| OSBPL3       | 0.952769 | 0.796421 | 1.13981  | 0.596776 |
| KMT5A        | 0.920237 | 0.676067 | 1.252591 | 0.597235 |
| PNPLA6       | 0.920861 | 0.678005 | 1.250706 | 0.597629 |
| RAN          | 1.080838 | 0.808524 | 1.444866 | 0.599672 |
| SUCLG1       | 1.100488 | 0.76965  | 1.573539 | 0.599683 |
| SULT2A1      | 1.010502 | 0.971812 | 1.050733 | 0.599934 |
| MED9         | 0.924106 | 0.68701  | 1.243026 | 0.60182  |
| OSBPL9       | 0.926418 | 0.694547 | 1.235698 | 0.60305  |
| ARNT         | 1.083037 | 0.801286 | 1.463858 | 0.603839 |
| CYP2B6       | 1.013677 | 0.962195 | 1.067913 | 0.609483 |
| ACBD6        | 0.918015 | 0.661003 | 1.274959 | 0.609741 |
| NSDHL        | 1.080959 | 0.800715 | 1.459286 | 0.611149 |
| CAMKK2       | 0.918176 | 0.660461 | 1.276454 | 0.611555 |
| D2HGDH       | 0.945026 | 0.758555 | 1.177334 | 0.614116 |
| NR1H4        | 0.985581 | 0.930575 | 1.043838 | 0.620109 |
| CYP2C19      | 1.014756 | 0.957637 | 1.075283 | 0.6202   |
| ADH4         | 0.988247 | 0.943057 | 1.035602 | 0.62055  |
| B4GALT4      | 1.07233  | 0.812381 | 1.415459 | 0.621998 |
| JMJD7.PLA2G1 | 0.957213 | 0.803114 | 1.14088  | 0.625349 |
| ALDH9A1      | 1.072719 | 0.808764 | 1.422821 | 0.626176 |
| FUT1         | 1.0501   | 0.862555 | 1.278423 | 0.626258 |
| MORC2        | 1.079028 | 0.794223 | 1.465962 | 0.626641 |
| UGT1A10      | 0.981365 | 0.909726 | 1.058646 | 0.626699 |
| LPCAT2       | 0.95499  | 0.793077 | 1.14996  | 0.627063 |
| THRSP        | 1.017804 | 0.947716 | 1.093075 | 0.62783  |
| CYP1A2       | 1.009254 | 0.972115 | 1.047813 | 0.630123 |
| ECI2         | 1.06041  | 0.834539 | 1.347412 | 0.631265 |
| PNPLA4       | 1.064724 | 0.822892 | 1.377626 | 0.633296 |
| PITPNM2      | 0.956048 | 0.794657 | 1.150217 | 0.633753 |
| ALOX5        | 0.960193 | 0.812275 | 1.135048 | 0.634151 |
| MBTPS1       | 1.070467 | 0.80753  | 1.419019 | 0.635861 |
| CGA          | 0.985697 | 0.928541 | 1.046371 | 0.636438 |
| PLAAT4       | 0.969245 | 0.851239 | 1.10361  | 0.637209 |
| ABHD3        | 1.047731 | 0.861069 | 1.274859 | 0.64138  |
| PTGIS        | 0.968025 | 0.843628 | 1.110765 | 0.643313 |
| MED16        | 0.934207 | 0.699879 | 1.246992 | 0.64416  |
| UGT2B28      | 0.986093 | 0.929041 | 1.046647 | 0.645096 |
| B3GNT5       | 0.966884 | 0.837767 | 1.115902 | 0.645175 |
| DGAT1        | 1.063674 | 0.816884 | 1.385022 | 0.646733 |
| ADH5         | 1.083592 | 0.768375 | 1.528122 | 0.647148 |
| TBXAS1       | 0.949534 | 0.76034  | 1.185803 | 0.64784  |

|           |          |          |          |          |
|-----------|----------|----------|----------|----------|
| ACSBG2    | 1.035096 | 0.892534 | 1.200428 | 0.648221 |
| MECR      | 0.922929 | 0.65357  | 1.303301 | 0.64875  |
| PPARA     | 0.958159 | 0.796673 | 1.152378 | 0.649915 |
| IDH1      | 0.949596 | 0.759214 | 1.187717 | 0.650524 |
| EHHADH    | 1.049296 | 0.852036 | 1.292225 | 0.650627 |
| ST8SIA5   | 1.028082 | 0.911951 | 1.159001 | 0.650657 |
| ACSL3     | 1.054818 | 0.836584 | 1.329981 | 0.651806 |
| ESYT3     | 0.970033 | 0.848797 | 1.108586 | 0.655132 |
| PDHB      | 0.932446 | 0.685458 | 1.268429 | 0.655964 |
| FMO1      | 0.973293 | 0.863814 | 1.096647 | 0.656588 |
| ST3GAL5   | 1.046996 | 0.854473 | 1.282897 | 0.65778  |
| PIK3R1    | 0.957683 | 0.79089  | 1.159652 | 0.657864 |
| DHCR7     | 0.960587 | 0.803794 | 1.147964 | 0.658298 |
| SDHD      | 1.069103 | 0.792735 | 1.441819 | 0.661472 |
| SLCO1B3   | 0.98456  | 0.917916 | 1.056043 | 0.663475 |
| AKR1B15   | 0.979144 | 0.889824 | 1.077431 | 0.665852 |
| MSMO1     | 1.056807 | 0.822089 | 1.358541 | 0.666342 |
| GNPAT     | 1.074237 | 0.775192 | 1.488644 | 0.667051 |
| MTOR      | 1.066254 | 0.79533  | 1.429466 | 0.667989 |
| ACAD10    | 1.068517 | 0.788717 | 1.447577 | 0.668793 |
| ASAHI     | 1.039974 | 0.868332 | 1.245544 | 0.670184 |
| PLA2G5    | 1.031861 | 0.891969 | 1.193694 | 0.673065 |
| PLEKHA1   | 1.05526  | 0.820805 | 1.356684 | 0.674797 |
| LPIN1     | 0.955758 | 0.772181 | 1.182978 | 0.67754  |
| CPNE1     | 1.053802 | 0.822898 | 1.349496 | 0.677936 |
| ST6GALNAC | 1.040152 | 0.862294 | 1.254695 | 0.680742 |
| THRAP3    | 1.074988 | 0.761593 | 1.517346 | 0.680919 |
| CAMKK1    | 1.052391 | 0.824488 | 1.343288 | 0.681743 |
| ALDH3B2   | 1.01955  | 0.928513 | 1.119513 | 0.684947 |
| ALDH1B1   | 1.051715 | 0.824117 | 1.342167 | 0.685297 |
| MED13L    | 1.040831 | 0.857077 | 1.263982 | 0.686359 |
| LPCAT3    | 1.041796 | 0.853578 | 1.271516 | 0.687136 |
| HSD17B10  | 0.942873 | 0.707653 | 1.256279 | 0.68787  |
| ETNK1     | 1.049349 | 0.828938 | 1.328365 | 0.688846 |
| ACADS     | 0.963118 | 0.800861 | 1.158249 | 0.689721 |
| VDR       | 1.051504 | 0.821694 | 1.345588 | 0.689787 |
| PNPLA5    | 1.009006 | 0.965514 | 1.054457 | 0.690026 |
| CYP2J2    | 0.972087 | 0.84535  | 1.117825 | 0.691218 |
| STARD4    | 0.958452 | 0.7773   | 1.181824 | 0.691358 |
| B4GALT3   | 1.05656  | 0.801086 | 1.393508 | 0.696857 |
| PTDSS1    | 1.050252 | 0.820223 | 1.344793 | 0.697475 |
| ADSL      | 0.938609 | 0.681343 | 1.293015 | 0.698277 |
| ABCC1     | 1.056829 | 0.798974 | 1.397903 | 0.698519 |
| MED4      | 1.070463 | 0.75812  | 1.511489 | 0.698886 |
| PCK2      | 0.949244 | 0.726467 | 1.240337 | 0.702686 |
| THEM4     | 1.052716 | 0.808409 | 1.370855 | 0.702967 |
| DLST      | 1.066138 | 0.766011 | 1.483856 | 0.704187 |
| GAPDHS    | 1.007704 | 0.968437 | 1.048563 | 0.705098 |
| ACOT6     | 1.012693 | 0.948416 | 1.081325 | 0.706186 |
| MED29     | 0.937098 | 0.668054 | 1.314494 | 0.706724 |
| FABP2     | 1.007287 | 0.969433 | 1.04662  | 0.710255 |
| ODC1      | 0.965888 | 0.801844 | 1.163494 | 0.71477  |
| ABCB11    | 1.009555 | 0.959326 | 1.062414 | 0.714944 |
| HTD2      | 1.011804 | 0.948739 | 1.079061 | 0.720809 |
| PLA2G4C   | 0.964178 | 0.789338 | 1.177745 | 0.720832 |
| AKR1C4    | 0.99239  | 0.951429 | 1.035114 | 0.722422 |
| LCN9      | 1.011211 | 0.950867 | 1.075384 | 0.722502 |
| PDHA1     | 1.059965 | 0.768549 | 1.461879 | 0.722562 |

|          |          |          |          |          |
|----------|----------|----------|----------|----------|
| SPTSSB   | 1.01501  | 0.93485  | 1.102043 | 0.72263  |
| NCOA1    | 1.047611 | 0.809882 | 1.355121 | 0.723193 |
| GGT7     | 0.962825 | 0.780107 | 1.188339 | 0.72421  |
| ACOT8    | 1.051147 | 0.791961 | 1.395158 | 0.729858 |
| HSD11B2  | 1.029199 | 0.873876 | 1.212128 | 0.730241 |
| UGT2B7   | 1.010597 | 0.951705 | 1.073133 | 0.730761 |
| PLIN2    | 0.967975 | 0.804122 | 1.165216 | 0.730853 |
| ALOX5AP  | 0.970166 | 0.816024 | 1.153425 | 0.731528 |
| SLC27A3  | 0.958382 | 0.751207 | 1.222694 | 0.7323   |
| ECHS1    | 0.946874 | 0.692428 | 1.29482  | 0.732445 |
| PPARD    | 0.949515 | 0.705508 | 1.277915 | 0.732481 |
| UGT2B11  | 0.99095  | 0.940549 | 1.044052 | 0.732832 |
| ELOVL5   | 1.029063 | 0.872018 | 1.214389 | 0.734548 |
| LIPI     | 0.98835  | 0.923006 | 1.05832  | 0.73703  |
| SLC25A20 | 1.044947 | 0.805441 | 1.355672 | 0.740638 |
| ST3GAL6  | 0.964401 | 0.777597 | 1.196082 | 0.741414 |
| ARSH     | 1.017852 | 0.915876 | 1.131182 | 0.742525 |
| PRKACA   | 1.060519 | 0.746486 | 1.506661 | 0.74293  |
| PLEKHA2  | 0.966386 | 0.786962 | 1.186718 | 0.744207 |
| ALOXE3   | 1.017873 | 0.914753 | 1.132617 | 0.745143 |
| CUBN     | 0.965308 | 0.779835 | 1.194893 | 0.745683 |
| PITPNB   | 1.05153  | 0.775544 | 1.425728 | 0.746327 |
| GGT6     | 1.015871 | 0.921569 | 1.119824 | 0.751403 |
| ACOT4    | 0.972702 | 0.81901  | 1.155236 | 0.752443 |
| ALOX12   | 0.967197 | 0.785405 | 1.191066 | 0.753534 |
| ELOVL1   | 0.949697 | 0.687278 | 1.312314 | 0.754438 |
| ABCB4    | 1.035715 | 0.829358 | 1.293418 | 0.756906 |
| AGK      | 1.056315 | 0.74622  | 1.495272 | 0.75733  |
| HPGDS    | 0.97436  | 0.825218 | 1.150457 | 0.759276 |
| BDH2     | 1.038587 | 0.815207 | 1.323178 | 0.759285 |
| RGL1     | 1.029237 | 0.855797 | 1.237828 | 0.75955  |
| ELOVL7   | 0.978177 | 0.848987 | 1.127025 | 0.760131 |
| HSD17B13 | 0.989067 | 0.919911 | 1.063422 | 0.766277 |
| LPIN2    | 1.034927 | 0.825005 | 1.298264 | 0.766606 |
| PHOSPHO1 | 0.975672 | 0.828019 | 1.149655 | 0.768623 |
| AACS     | 0.962381 | 0.743644 | 1.245457 | 0.77069  |
| SLC44A4  | 1.016437 | 0.910712 | 1.134435 | 0.771106 |
| HSD17B12 | 1.037317 | 0.80966  | 1.328987 | 0.771961 |
| CPT1C    | 0.967767 | 0.774965 | 1.208535 | 0.772553 |
| NEU4     | 1.008459 | 0.952243 | 1.067993 | 0.773473 |
| SGPP2    | 0.985773 | 0.893709 | 1.08732  | 0.774535 |
| ACAT2    | 1.033719 | 0.823494 | 1.29761  | 0.774973 |
| MLYCD    | 1.041741 | 0.78641  | 1.379971 | 0.775602 |
| HADHA    | 1.050785 | 0.744823 | 1.482433 | 0.777847 |
| SMPD4    | 0.956327 | 0.698773 | 1.308809 | 0.780293 |
| IKBKG    | 1.03848  | 0.796402 | 1.354141 | 0.780376 |
| ABHD4    | 1.042974 | 0.77576  | 1.402231 | 0.780537 |
| HMGCLL1  | 0.989363 | 0.916379 | 1.06816  | 0.784456 |
| PCBD1    | 1.036781 | 0.798237 | 1.346611 | 0.786576 |
| CHAT     | 0.989934 | 0.919971 | 1.065219 | 0.786764 |
| SCP2     | 1.041721 | 0.773958 | 1.402122 | 0.787439 |
| UGT1A9   | 1.008497 | 0.94787  | 1.073001 | 0.789109 |
| PPT2     | 1.042723 | 0.767294 | 1.41702  | 0.789214 |
| ETNK2    | 0.979083 | 0.837872 | 1.144092 | 0.790228 |
| ALDOA    | 1.032778 | 0.81243  | 1.312887 | 0.792234 |
| OSBPL1A  | 0.970765 | 0.775515 | 1.215175 | 0.795662 |
| LGMN     | 1.031957 | 0.81316  | 1.309624 | 0.795834 |
| HILPDA   | 1.027853 | 0.831219 | 1.271004 | 0.799815 |

|           |          |          |          |          |
|-----------|----------|----------|----------|----------|
| MTMR7     | 0.980904 | 0.844866 | 1.138846 | 0.800175 |
| IKBKB     | 1.030719 | 0.814794 | 1.303865 | 0.800837 |
| PRKACB    | 1.016886 | 0.891961 | 1.159307 | 0.802292 |
| TKFC      | 1.036018 | 0.78464  | 1.367931 | 0.80294  |
| CRYZ      | 0.973552 | 0.786493 | 1.205101 | 0.805513 |
| UBE2I     | 1.048874 | 0.71398  | 1.540852 | 0.80788  |
| S1PR3     | 0.977711 | 0.813717 | 1.174757 | 0.809847 |
| GCDH      | 1.036044 | 0.773971 | 1.386856 | 0.811899 |
| MED19     | 1.037205 | 0.76131  | 1.413083 | 0.816908 |
| PIAS4     | 0.961891 | 0.689019 | 1.34283  | 0.819451 |
| ACOT2     | 0.973457 | 0.772079 | 1.227361 | 0.820039 |
| LPIN3     | 0.973362 | 0.769583 | 1.2311   | 0.82177  |
| NEU3      | 1.02717  | 0.812757 | 1.298147 | 0.822439 |
| PTGS1     | 0.979393 | 0.816001 | 1.175501 | 0.823068 |
| RXRA      | 0.968551 | 0.730522 | 1.284139 | 0.824274 |
| HACL1     | 1.033417 | 0.772022 | 1.383316 | 0.825147 |
| STARD3    | 0.979375 | 0.813818 | 1.178613 | 0.825422 |
| LPCAT4    | 1.031663 | 0.77684  | 1.370074 | 0.829489 |
| ACAA2     | 1.027052 | 0.805295 | 1.309875 | 0.829702 |
| FADS1     | 0.983754 | 0.847052 | 1.142518 | 0.8301   |
| G6PC2     | 1.004488 | 0.963874 | 1.046813 | 0.831614 |
| INSIG1    | 0.978061 | 0.795772 | 1.202108 | 0.833049 |
| CYP11A1   | 0.987402 | 0.8775   | 1.111068 | 0.833212 |
| UBE2L6    | 0.979614 | 0.807763 | 1.188027 | 0.834231 |
| EPHX2     | 1.017535 | 0.864457 | 1.19772  | 0.834469 |
| IDH3B     | 0.966622 | 0.700021 | 1.334758 | 0.836645 |
| ELOVL4    | 1.015397 | 0.877958 | 1.174353 | 0.836853 |
| MED28     | 1.033261 | 0.752071 | 1.419584 | 0.840001 |
| HMGCS2    | 0.994558 | 0.941756 | 1.050319 | 0.844556 |
| MED24     | 0.978535 | 0.785548 | 1.218933 | 0.846489 |
| ACOT12    | 0.996227 | 0.958483 | 1.035458 | 0.847896 |
| AGRP      | 1.008134 | 0.92733  | 1.095978 | 0.849278 |
| TBL1XR1   | 1.025121 | 0.793632 | 1.324131 | 0.849315 |
| PLAAT5    | 1.007806 | 0.92976  | 1.092403 | 0.850042 |
| UCP1      | 1.00594  | 0.945938 | 1.069748 | 0.850302 |
| CYP19A1   | 1.008808 | 0.920809 | 1.105217 | 0.850625 |
| GPX2      | 0.990972 | 0.901494 | 1.089333 | 0.851019 |
| GLTP      | 1.02884  | 0.756502 | 1.399218 | 0.856185 |
| PLA2G12B  | 1.003507 | 0.965713 | 1.042781 | 0.858141 |
| STAT3     | 0.976547 | 0.750517 | 1.27065  | 0.859755 |
| PIP4P1    | 0.969553 | 0.686657 | 1.368999 | 0.860563 |
| ST6GALNAC | 0.973782 | 0.717682 | 1.321271 | 0.86451  |
| CPT2      | 0.976262 | 0.738376 | 1.290788 | 0.866109 |
| PLA2G4E   | 0.995266 | 0.94175  | 1.051823 | 0.866355 |
| ALDH3B1   | 1.018615 | 0.81905  | 1.266805 | 0.86833  |
| CYP2E1    | 0.988565 | 0.862712 | 1.132777 | 0.868518 |
| AKT3      | 1.013237 | 0.866417 | 1.184936 | 0.86922  |
| PLPP1     | 0.980442 | 0.773509 | 1.242736 | 0.870285 |
| IRS1      | 1.012972 | 0.865208 | 1.185971 | 0.872718 |
| PLA1A     | 1.012234 | 0.872024 | 1.174988 | 0.873    |
| ENO2      | 1.012138 | 0.872158 | 1.174584 | 0.873778 |
| LCN1      | 1.003542 | 0.959971 | 1.049091 | 0.875934 |
| STARD6    | 0.995979 | 0.946717 | 1.047805 | 0.876301 |
| AADAT     | 1.012032 | 0.869991 | 1.177264 | 0.876819 |
| PRKAA1    | 1.017847 | 0.812241 | 1.275501 | 0.877882 |
| PLA2G15   | 1.0215   | 0.776997 | 1.342941 | 0.87888  |
| PIP5K1C   | 0.971692 | 0.670216 | 1.408777 | 0.879558 |
| ACO2      | 0.98124  | 0.766969 | 1.255373 | 0.880246 |



|           |          |          |          |          |
|-----------|----------|----------|----------|----------|
| AGPS      | 1.0126   | 0.859275 | 1.193283 | 0.881186 |
| UGT1A4    | 1.007766 | 0.909356 | 1.116826 | 0.882695 |
| CYP17A1   | 0.988262 | 0.844615 | 1.156341 | 0.882868 |
| FAR2      | 1.011308 | 0.869266 | 1.176559 | 0.884229 |
| CD36      | 1.006714 | 0.919125 | 1.102649 | 0.885436 |
| MED6      | 1.025971 | 0.721017 | 1.459906 | 0.88671  |
| DGKD      | 0.984552 | 0.79152  | 1.224659 | 0.888796 |
| NFKB1     | 1.018508 | 0.786647 | 1.318709 | 0.889334 |
| SUMO2     | 1.023575 | 0.735388 | 1.424696 | 0.890148 |
| SLC27A5   | 0.984016 | 0.781703 | 1.238692 | 0.890869 |
| MED25     | 0.978495 | 0.711774 | 1.345162 | 0.893493 |
| FABP3     | 1.011209 | 0.858236 | 1.191449 | 0.894037 |
| HELZ2     | 1.011935 | 0.848678 | 1.206596 | 0.894853 |
| PIK3R3    | 0.984597 | 0.781994 | 1.239692 | 0.89494  |
| PCTP      | 1.016117 | 0.79804  | 1.293785 | 0.896795 |
| DGAT2L6   | 0.997119 | 0.954025 | 1.042161 | 0.898172 |
| CYP7A1    | 0.997056 | 0.952308 | 1.043907 | 0.899868 |
| CRAT      | 0.991656 | 0.869746 | 1.130655 | 0.900372 |
| PCYT1B    | 1.006961 | 0.902244 | 1.123832 | 0.901459 |
| GM2A      | 0.982828 | 0.745872 | 1.295062 | 0.90206  |
| ENPP7     | 1.002835 | 0.957624 | 1.05018  | 0.904276 |
| NFYC      | 0.980008 | 0.699906 | 1.372207 | 0.906398 |
| SOAT1     | 0.988121 | 0.809407 | 1.206294 | 0.906543 |
| SGPL1     | 1.016188 | 0.777021 | 1.32897  | 0.906635 |
| ACACB     | 0.990932 | 0.850315 | 1.154804 | 0.907129 |
| KDSR      | 1.016518 | 0.763272 | 1.353788 | 0.91077  |
| UGT2B15   | 1.003899 | 0.937542 | 1.074952 | 0.911203 |
| PRKAB1    | 1.018197 | 0.740389 | 1.400244 | 0.911669 |
| SLC27A4   | 0.985439 | 0.760164 | 1.277474 | 0.911805 |
| DGKI      | 1.008437 | 0.86413  | 1.176844 | 0.91508  |
| DGKG      | 1.008973 | 0.856102 | 1.189142 | 0.915134 |
| SMPD2     | 0.984869 | 0.74261  | 1.306158 | 0.915706 |
| PNLIPRP1  | 1.002061 | 0.964233 | 1.041373 | 0.916477 |
| CYP2R1    | 0.98392  | 0.725549 | 1.334297 | 0.916927 |
| CYP51A1   | 1.009277 | 0.847764 | 1.20156  | 0.917342 |
| VAC14     | 0.98373  | 0.720424 | 1.343272 | 0.917798 |
| DEGS1     | 1.010546 | 0.827825 | 1.233597 | 0.917891 |
| CERS5     | 1.019379 | 0.707389 | 1.46897  | 0.917993 |
| MFSD2A    | 1.006889 | 0.883038 | 1.148111 | 0.918343 |
| CYP2C8    | 0.995192 | 0.907478 | 1.091386 | 0.918463 |
| MED8      | 1.018317 | 0.715329 | 1.449638 | 0.919763 |
| PLD6      | 1.009999 | 0.829894 | 1.229189 | 0.920915 |
| OSBPL5    | 1.014206 | 0.763431 | 1.347355 | 0.92246  |
| PIK3R5    | 0.991348 | 0.830891 | 1.182791 | 0.923154 |
| ACOT7     | 1.011091 | 0.806793 | 1.267121 | 0.9237   |
| ST3GAL3   | 0.985138 | 0.715285 | 1.356796 | 0.926949 |
| PI4KB     | 1.015566 | 0.72608  | 1.420471 | 0.928108 |
| ALDH3A2   | 0.991305 | 0.817535 | 1.20201  | 0.929231 |
| RDH11     | 1.013339 | 0.756188 | 1.357939 | 0.929299 |
| HSD17B11  | 1.009472 | 0.819253 | 1.243857 | 0.929483 |
| TNFAIP8L3 | 1.00709  | 0.85955  | 1.179955 | 0.930343 |
| CYP11B2   | 0.997442 | 0.941131 | 1.057123 | 0.931168 |
| MBOAT1    | 1.006606 | 0.861285 | 1.176447 | 0.934031 |
| B4GAT1    | 1.01155  | 0.767935 | 1.332448 | 0.934893 |
| SGMS1     | 1.009769 | 0.798864 | 1.276355 | 0.93518  |
| GPAT3     | 0.993962 | 0.85617  | 1.153931 | 0.936604 |
| UGT2B17   | 0.99788  | 0.947025 | 1.051466 | 0.936623 |
| EPHX1     | 0.991866 | 0.80213  | 1.226483 | 0.939901 |

|          |          |          |          |          |
|----------|----------|----------|----------|----------|
| PRKACG   | 0.998326 | 0.955072 | 1.043538 | 0.940888 |
| SRD5A1   | 1.007491 | 0.827001 | 1.227373 | 0.940932 |
| ELOVL3   | 1.004002 | 0.902824 | 1.116519 | 0.941255 |
| GK       | 1.008131 | 0.810294 | 1.254271 | 0.942078 |
| PIK3CG   | 0.995292 | 0.875134 | 1.131948 | 0.94269  |
| MED22    | 1.010173 | 0.760372 | 1.342041 | 0.944325 |
| ACADSB   | 0.994506 | 0.848318 | 1.165885 | 0.945849 |
| CYP1A1   | 1.001628 | 0.951041 | 1.054905 | 0.950959 |
| PLAAT1   | 1.002789 | 0.91706  | 1.096533 | 0.951288 |
| FADS2    | 0.99684  | 0.900348 | 1.103673 | 0.951408 |
| PLD1     | 0.994469 | 0.828808 | 1.193242 | 0.95243  |
| PON2     | 0.992562 | 0.759675 | 1.296843 | 0.95636  |
| MED27    | 0.991148 | 0.707603 | 1.388312 | 0.958755 |
| B3GNT4   | 1.004675 | 0.836852 | 1.206153 | 0.96011  |
| MTMR14   | 1.008381 | 0.725844 | 1.400898 | 0.960315 |
| MDH2     | 0.993828 | 0.738479 | 1.33747  | 0.967406 |
| PRKD3    | 1.003602 | 0.842511 | 1.195494 | 0.967872 |
| B4GALNT1 | 1.002832 | 0.87081  | 1.154868 | 0.968682 |
| MED30    | 0.995434 | 0.777663 | 1.274188 | 0.971018 |
| ACSM6    | 1.00086  | 0.952015 | 1.052211 | 0.973151 |
| INPPL1   | 1.004316 | 0.749133 | 1.346424 | 0.977028 |
| PLPP3    | 0.997126 | 0.811202 | 1.225665 | 0.978195 |
| BPHL     | 1.003558 | 0.740146 | 1.360715 | 0.981759 |
| OSTC     | 1.003741 | 0.724463 | 1.39068  | 0.982092 |
| UGT1A7   | 0.999236 | 0.934598 | 1.068344 | 0.982129 |
| CSNK2A2  | 1.003064 | 0.74342  | 1.35339  | 0.98403  |
| MED10    | 0.996736 | 0.715274 | 1.388953 | 0.984593 |
| PLA2R1   | 1.001739 | 0.805335 | 1.246042 | 0.987549 |
| ARSG     | 0.999036 | 0.837439 | 1.191816 | 0.991453 |
| MAPK8    | 0.998774 | 0.758065 | 1.315916 | 0.993045 |
| FA2H     | 1.000539 | 0.870938 | 1.149425 | 0.993929 |
| SPHK2    | 1.000497 | 0.759588 | 1.317813 | 0.997178 |
| SMPD3    | 0.99984  | 0.873607 | 1.144313 | 0.998146 |
| ACSS1    | 1.000084 | 0.845417 | 1.183047 | 0.99922  |
