# Supplementary material for: Exploration of prognosis and immunometabolism landscapes in ER+ breast cancer based on a novel lipid metabolism-related signature
Source: PubMed Central journal article supplement (PMC10352658; doi:10.3389/fimmu.2023.1199465), 2023-07-04
Supplement: Table_5.pdf [file Table_5.pdf]

| Genes    | p.value  | HR       | Low 95%CI | High 95%CI |
|----------|----------|----------|-----------|------------|
| FIG4     | 1.74E-05 | 2.545856 | 1.6621372 | 3.8994256  |
| OCRL     | 0.0002   | 2.203484 | 1.4530075 | 3.3415808  |
| INPP5F   | 0.001632 | 1.955129 | 1.2882654 | 2.96719    |
| CPT1A    | 0.001921 | 1.899463 | 1.2664496 | 2.8488769  |
| FAM120B  | 0.002169 | 1.887665 | 1.2575852 | 2.8334296  |
| MMUT     | 0.002498 | 1.886319 | 1.2501324 | 2.8462575  |
| ALOX15   | 0.003065 | 1.857917 | 1.2329879 | 2.7995859  |
| PRKAB2   | 0.002933 | 1.847851 | 1.2330026 | 2.7692999  |
| AHRR     | 0.003792 | 1.82959  | 1.2154475 | 2.7540474  |
| OSBPL10  | 0.003682 | 1.815757 | 1.2140242 | 2.7157409  |
| CHUK     | 0.006971 | 1.761926 | 1.1676316 | 2.6587009  |
| ACBD5    | 0.012212 | 1.678285 | 1.1194191 | 2.5161615  |
| CCNC     | 0.014279 | 1.668597 | 1.1078611 | 2.5131449  |
| PTGES3   | 0.015405 | 1.647285 | 1.1000266 | 2.4668026  |
| MBTPS2   | 0.024432 | 1.58981  | 1.0616353 | 2.380758   |
| CLOCK    | 0.025952 | 1.586016 | 1.0568485 | 2.3801384  |
| SYNJ2    | 0.024885 | 1.582207 | 1.0596395 | 2.3624817  |
| HIBCH    | 0.027527 | 1.577847 | 1.0517875 | 2.3670177  |
| PLEKHA3  | 0.02975  | 1.575347 | 1.0456435 | 2.3733882  |
| HSP90AA1 | 0.026945 | 1.563051 | 1.0522662 | 2.3217781  |
| APOA5    | 0.03116  | 1.547986 | 1.0403434 | 2.3033361  |
| RAB5A    | 0.036698 | 1.538705 | 1.0269985 | 2.305371   |
| PLA2G12A | 0.035672 | 1.534574 | 1.0290949 | 2.2883379  |
| STARD3NL | 0.036746 | 1.530388 | 1.026549  | 2.2815148  |
| MED23    | 0.045055 | 1.504792 | 1.009048  | 2.2440934  |
| CYP27A1  | 0.045307 | 0.666178 | 0.4475755 | 0.9915478  |
| FUT6     | 0.041332 | 0.661426 | 0.4446531 | 0.9838779  |
| HPGD     | 0.038761 | 0.658209 | 0.4427003 | 0.9786285  |
| PLPPR1   | 0.037525 | 0.655768 | 0.4406315 | 0.9759429  |
| CYP2D6   | 0.033301 | 0.645756 | 0.4316881 | 0.9659764  |
| PIK3CD   | 0.024264 | 0.629843 | 0.4212804 | 0.9416583  |
| PLEKHA4  | 0.02249  | 0.628519 | 0.4217909 | 0.936569   |
| ADH6     | 0.020066 | 0.624196 | 0.4195533 | 0.9286574  |
| PRKCQ    | 0.018741 | 0.614003 | 0.4088344 | 0.9221324  |
| PLA2G2D  | 0.017308 | 0.612953 | 0.4096168 | 0.9172257  |
| PLD4     | 0.018629 | 0.612225 | 0.4068237 | 0.9213327  |
| SLCO1A2  | 0.012219 | 0.599181 | 0.4013901 | 0.8944352  |
| APOA1    | 0.013238 | 0.598297 | 0.3984927 | 0.8982818  |
| ALDH3A1  | 0.01098  | 0.597432 | 0.40169   | 0.8885577  |
| CBR3     | 0.01139  | 0.595413 | 0.3984804 | 0.8896729  |
| S1PR5    | 0.010493 | 0.589148 | 0.3928685 | 0.8834889  |
| CYP24A1  | 0.008874 | 0.588216 | 0.3953002 | 0.8752788  |
| NFKBIE   | 0.005109 | 0.562947 | 0.3765338 | 0.8416501  |
| NFKBIA   | 0.004202 | 0.557633 | 0.3738317 | 0.8318037  |
| CHKB     | 0.005352 | 0.557367 | 0.3693946 | 0.8409906  |
| CERS3    | 0.002471 | 0.539415 | 0.3616911 | 0.8044663  |
| SLC27A6  | 0.002193 | 0.533298 | 0.3566583 | 0.7974211  |
| CA6      | 0.000792 | 0.496717 | 0.3300748 | 0.7474897  |
| S1PR4    | 0.000849 | 0.486403 | 0.3185064 | 0.7428053  |
| FABP7    | 0.000553 | 0.484222 | 0.3208545 | 0.7307694  |
