# Supplementary material for: Exploration of prognosis and immunometabolism landscapes in ER+ breast cancer based on a novel lipid metabolism-related signature
Source: PubMed Central journal article supplement (PMC10352658; doi:10.3389/fimmu.2023.1199465), 2023-07-04
Supplement: Table_6.pdf [file Table_6.pdf]

| Gene-CpG                              | HR    | CI          | p        |
|---------------------------------------|-------|-------------|----------|
| HIBCH-TSS200-Island-cg01027365        | 2.026 | 1.229-3.341 | 0.0031   |
| HIBCH-Body-N_Shore-cg16814399         | 0.598 | 0.397-0.901 | 0.017    |
| OSBPL10-Body-Open_Sea-cg02057211      | 0.57  | 0.357-0.908 | 0.013    |
| OSBPL10-Body-Open_Sea-cg02099390      | 0.545 | 0.33-0.899  | 0.012    |
| OSBPL10-Body-Open_Sea-cg04370634      | 0.544 | 0.369-0.802 | 0.0023   |
| OSBPL10-Body-Open_Sea-cg10789050      | 0.456 | 0.307-0.676 | 0.00014  |
| OSBPL10-Body-Open_Sea-cg22259536      | 0.62  | 0.376-1.021 | 0.049    |
| OSBPL10-Body-Open_Sea-cg22539670      | 0.512 | 0.325-0.805 | 0.0023   |
| OSBPL10-Body-Open_Sea-cg24264962      | 0.501 | 0.332-0.755 | 0.00068  |
| OSBPL10-Body-Open_Sea-cg24391989      | 0.467 | 0.291-0.748 | 0.00072  |
| OSBPL10-Body-Open_Sea-cg27298830      | 0.598 | 0.404-0.884 | 0.011    |
| FIG4-Body-S_Shelf-cg03492495          | 0.619 | 0.421-0.912 | 0.016    |
| FIG4-Body-Open_Sea-cg04940695         | 0.587 | 0.399-0.865 | 0.0075   |
| FIG4-Body-Open_Sea-cg16019558         | 0.545 | 0.358-0.931 | 0.0068   |
| OCRL-TSS200-Island-cg05032353         | 0.611 | 0.406-0.919 | 0.022    |
| OCRL-TSS200-Island-cg27633753         | 0.621 | 0.42-0.918  | 0.019    |
| OCRL-5'UTR;1stExon-Island-cg05147108  | 0.494 | 0.335-0.728 | 0.00038  |
| OCRL-5'UTR;1stExon-Island-cg16716035  | 0.436 | 0.294-0.646 | 0.000035 |
| OCRL-Body-Island-cg13532816           | 0.641 | 0.405-1.013 | 0.048    |
| OCRL-3'UTR-Open_Sea-cg06055803        | 1.666 | 1.113-2.494 | 0.012    |
| CPT1A-5'UTR-N_Shore-cg00574958        | 0.417 | 0.282-0.616 | 0.000011 |
| CPT1A-5'UTR-N_Shore-cg17058475        | 0.436 | 0.294-0.648 | 0.000033 |
| CPT1A-5'UTR-N_Shore-cg19081843        | 1.752 | 1.166-2.633 | 0.0058   |
| CPT1A-5'UTR-N_Shore-cg23756264        | 0.529 | 0.317-0.883 | 0.0094   |
| CPT1A-TSS200-N_Shore-cg10132543       | 1.733 | 1.118-2.685 | 0.011    |
| CPT1A-Body-N_Shore-cg10703936         | 0.652 | 0.422-1.007 | 0.047    |
| CPT1A-Body-N_Shore-cg23406642         | 0.66  | 0.445-0.979 | 0.042    |
| CPT1A-TSS1500-N_Shore-cg13786863      | 0.608 | 0.361-1.023 | 0.048    |
| CPT1A-TSS1500-N_Shore-cg15616358      | 0.604 | 0.385-0.948 | 0.023    |
| CPT1A-TSS1500-N_Shore-cg24366211      | 0.552 | 0.328-0.93  | 0.017    |
| CPT1A-5'UTR-Island-cg01082498         | 0.613 | 0.385-0.975 | 0.031    |
| CPT1A-5'UTR-Island-cg09806934         | 0.665 | 0.45-0.983  | 0.039    |
| CPT1A-5'UTR-Island-cg26989316         | 0.492 | 0.333-0.725 | 0.00035  |
| CPT1A-Body-Island-cg10553894          | 0.483 | 0.279-0.837 | 0.0049   |
| CPT1A-Body-Open_Sea-cg01926073        | 0.563 | 0.381-0.832 | 0.0038   |
| CPT1A-Body-Open_Sea-cg03855388        | 0.434 | 0.293-0.642 | 0.000026 |
| CPT1A-Body-Open_Sea-cg04732324        | 0.49  | 0.332-0.724 | 0.00034  |
| CPT1A-Body-Open_Sea-cg05710301        | 0.529 | 0.356-0.787 | 0.0022   |
| CPT1A-Body-Open_Sea-cg06042565        | 0.602 | 0.405-0.896 | 0.011    |
| CPT1A-Body-Open_Sea-cg13491471        | 0.562 | 0.377-0.838 | 0.0041   |
| CPT1A-Body-Open_Sea-cg18262591        | 0.556 | 0.372-0.833 | 0.0058   |
| CPT1A-Body-Open_Sea-cg20629021        | 0.526 | 0.355-0.779 | 0.0012   |
| CPT1A-Body-Open_Sea-cg20809737        | 0.522 | 0.348-0.782 | 0.0024   |
| CPT1A-Body-Open_Sea-cg26906629        | 0.51  | 0.346-0.754 | 0.0077   |
| CPT1A-5'UTR-Open_Sea-cg20285002       | 0.459 | 0.311-0.678 | 0.000098 |
| CPT1A-3'UTR;Body-S_Shelf-cg02146941   | 0.517 | 0.307-0.871 | 0.0078   |
| CPT1A-Body-N_Shelf-cg21868480         | 0.65  | 0.44-0.961  | 0.03     |
| CPT1A-5'UTR-N_Shelf-cg22911054        | 0.621 | 0.418-0.922 | 0.02     |
| INPP5F-Body;TSS1500-Island-cg02722214 | 0.61  | 0.405-0.919 | 0.021    |
| INPP5F-Body;TSS1500-Island-cg08338216 | 0.535 | 0.355-0.806 | 0.0039   |
| INPP5F-Body;TSS1500-Island-cg11613559 | 0.641 | 0.422-0.973 | 0.042    |
| INPP5F-Body;TSS1500-Island-cg20365618 | 0.654 | 0.441-0.972 | 0.039    |
| INPP5F-Body;TSS1500-S_Shore-cg0285755 | 0.568 | 0.383-0.841 | 0.0055   |
| INPP5F-Body-S_Shore-cg15922976        | 0.619 | 0.419-0.912 | 0.015    |
| INPP5F-Body-S_Shore-cg19978242        | 0.57  | 0.387-0.841 | 0.0049   |
| INPP5F-Body;TSS200-S_Shore-cg25045785 | 0.597 | 0.4-0.89    | 0.013    |
| INPP5F-3'UTR;Body-Open_Sea-cg03904674 | 0.59  | 0.358-0.973 | 0.03     |

|                                       |       |             |         |
|---------------------------------------|-------|-------------|---------|
| INPP5F-Body-Open_Sea-cg07679322       | 0.54  | 0.362-0.804 | 0.0032  |
| INPP5F-Body-Open_Sea-cg10053779       | 0.605 | 0.368-0.997 | 0.038   |
| INPP5F-Body-Open_Sea-cg11640046       | 1.664 | 1.096-2.528 | 0.014   |
| INPP5F-TSS1500-N_Shore-cg10149021     | 0.507 | 0.34-0.755  | 0.0012  |
| INPP5F-TSS1500-N_Shore-cg18425877     | 0.545 | 0.369-0.805 | 0.0027  |
| INPP5F-TSS1500-N_Shore-cg27613076     | 0.535 | 0.36-0.795  | 0.0019  |
| PTGES3-TSS1500-Island-cg20253639      | 1.787 | 1.016-3.144 | 0.031   |
| PTGES3-3'UTR-Open_Sea-cg13853217      | 0.558 | 0.352-0.884 | 0.0093  |
| HSP90AA1-Body-Open_Sea-cg05412906     | 0.487 | 0.301-0.788 | 0.0018  |
| HSP90AA1-Body-Open_Sea-cg13263472     | 0.651 | 0.434-0.975 | 0.042   |
| HSP90AA1-5'UTR;Body-Island-cg06798475 | 2.446 | 1.391-4.301 | 0.00057 |
| HSP90AA1-5'UTR;Body-Island-cg21735344 | 0.588 | 0.376-0.917 | 0.025   |
| HSP90AA1-TSS1500;Body-Island-cg233048 | 1.705 | 1.044-2.787 | 0.025   |
| HSP90AA1-Body-N-Shore-cg11789371      | 0.653 | 0.443-0.962 | 0.031   |
| HSP90AA1-TSS1500;Body-S-Shore-cg1379  | 1.635 | 1.005-2.658 | 0.038   |
| ALOX15-Body-Island-cg06222638         | 0.648 | 0.426-0.986 | 0.049   |
| ALOX15-1stExon-Island-cg09872233      | 1.74  | 1.136-2.664 | 0.0084  |
| ALOX15-Body-N_Shore-cg11609940        | 0.544 | 0.368-0.802 | 0.0025  |
