# Supplementary material for: Exploration of prognosis and immunometabolism landscapes in ER+ breast cancer based on a novel lipid metabolism-related signature
Source: PubMed Central journal article supplement (PMC10352658; doi:10.3389/fimmu.2023.1199465), 2023-07-04
Supplement: Table_7.pdf [file Table_7.pdf]

| gene     | lowMean  | highMean | logFC     | pValue   | fdr      |
|----------|----------|----------|-----------|----------|----------|
| LORICRIN | 248.7232 | 1.845387 | -7.074474 | 8.21E-09 | 2.34E-08 |
| C4BPA    | 233.4115 | 27.19701 | -3.101356 | 0.000354 | 0.000626 |
| SYT14    | 26.29177 | 69.62344 | 1.404962  | 0.02053  | 0.028252 |
| LEMD1    | 21.56608 | 8.029925 | -1.425306 | 6.08E-05 | 0.000118 |
| BLACAT1  | 31.6783  | 13.85037 | -1.19357  | 5.32E-06 | 1.16E-05 |
| BGLAP    | 72.28928 | 23.4015  | -1.627181 | 3.94E-14 | 1.71E-13 |
| PADI3    | 63.49377 | 128.6559 | 1.01883   | 0.007226 | 0.010682 |
| RNF186   | 13.88279 | 6.887781 | -1.011187 | 0.008572 | 0.012522 |
| CD52     | 2365.471 | 978.0998 | -1.274074 | 0.010807 | 0.015544 |
| H2AC20   | 92.37905 | 36.68329 | -1.332443 | 7.75E-08 | 2.02E-07 |
| TRIM67   | 59.03741 | 126.1421 | 1.095349  | 5.65E-05 | 0.00011  |
| ETV3L    | 8.428928 | 3.793017 | -1.152003 | 1.82E-06 | 4.17E-06 |
| IL19     | 45.97756 | 96.60349 | 1.071146  | 0.000631 | 0.001082 |
| VWA5B1   | 6.069825 | 15.71072 | 1.372023  | 0.002635 | 0.004149 |
| ALKAL2   | 47.87781 | 12.81796 | -1.901191 | 0.018585 | 0.025745 |
| BCL11A   | 329.808  | 161.3641 | -1.031307 | 5.04E-05 | 9.89E-05 |
| SLC9A2   | 215.3616 | 607.7531 | 1.496724  | 2.45E-10 | 7.88E-10 |
| TSPYL6   | 2.588529 | 7.910224 | 1.611586  | 0.003352 | 0.005195 |
| SLC5A7   | 14.97506 | 88.09476 | 2.556494  | 0.035054 | 0.046307 |
| EN1      | 305.4214 | 148.8653 | -1.036794 | 0.000991 | 0.001654 |
| SLC4A10  | 83.6808  | 274.3541 | 1.713071  | 3.62E-05 | 7.22E-05 |
| WNT6     | 48.86534 | 22.00499 | -1.150981 | 6.85E-12 | 2.48E-11 |
| CNGA3    | 48.96758 | 148.4838 | 1.600407  | 0.000361 | 0.000638 |
| C2orf50  | 77.70075 | 219.0698 | 1.49539   | 5.32E-09 | 1.54E-08 |
| KLHL41   | 45.08479 | 107.4389 | 1.252804  | 0.00546  | 0.00822  |
| USP37    | 706.3017 | 1435.706 | 1.023404  | 1.78E-44 | 6.61E-41 |
| POMC     | 43.49377 | 19.37905 | -1.166311 | 7.95E-13 | 3.11E-12 |
| RTP5     | 5.588529 | 2.658354 | -1.071935 | 2.63E-07 | 6.53E-07 |
| ASPRV1   | 155.7057 | 77.68579 | -1.0031   | 1.60E-06 | 3.68E-06 |
| SCN1A    | 34.68329 | 80.85037 | 1.221014  | 0.036789 | 0.048431 |
| NEB      | 145.0798 | 442.9975 | 1.610452  | 0.000177 | 0.000326 |
| KCNH7    | 3.660848 | 11.43142 | 1.642755  | 0.000102 | 0.000193 |
| PCARE    | 6.882793 | 2.855362 | -1.269321 | 0.003639 | 0.005613 |
| AOX1     | 577.1322 | 1194.09  | 1.048938  | 0.000554 | 0.000957 |
| CADPS    | 51.58105 | 238.0998 | 2.206653  | 0.029053 | 0.03893  |
| CLDN18   | 11.68828 | 29.14963 | 1.318415  | 0.013962 | 0.019717 |
| CLSTN2   | 10824.23 | 23737.7  | 1.132915  | 9.58E-12 | 3.43E-11 |
| LMOD3    | 15.28678 | 39.61845 | 1.373888  | 0.011044 | 0.015871 |
| STXBP5L  | 12.91022 | 46.71072 | 1.85524   | 5.57E-06 | 1.22E-05 |
| PEX5L    | 186.5985 | 705.8579 | 1.91944   | 1.68E-11 | 5.93E-11 |
| FGF12    | 229.4464 | 551.2219 | 1.264476  | 4.65E-05 | 9.16E-05 |
| FRG2C    | 3.598504 | 8.865337 | 1.300778  | 0.001044 | 0.001737 |
| EPHA6    | 23.13965 | 52.83791 | 1.191206  | 1.02E-06 | 2.40E-06 |
| ROPN1    | 68.2818  | 23.06983 | -1.565494 | 6.86E-07 | 1.64E-06 |
| TACR3    | 9.13217  | 19.08728 | 1.063582  | 1.97E-06 | 4.48E-06 |
| UGT2B4   | 353.7232 | 1148.297 | 1.698803  | 0.000711 | 0.001211 |
| AFP      | 83.87032 | 351.0773 | 2.065556  | 0.018641 | 0.025811 |
| NDST4    | 70.3616  | 154.6608 | 1.136248  | 3.03E-07 | 7.47E-07 |
| FGFBP1   | 108.2095 | 27.29676 | -1.987025 | 0.000507 | 0.00088  |
| FGFBP2   | 63.19202 | 21.6384  | -1.546148 | 0.000443 | 0.000776 |
| WDR17    | 138.0449 | 282.0948 | 1.031042  | 0.000174 | 0.00032  |
| FRAS1    | 369.5062 | 761.3491 | 1.042959  | 5.03E-08 | 1.33E-07 |
| ART3     | 89.37406 | 42.14464 | -1.084507 | 0.013115 | 0.018605 |
| CXCL1    | 105.0898 | 41.79551 | -1.330202 | 0.011874 | 0.016978 |
| CXCL5    | 59.99501 | 13.95511 | -2.104049 | 0.036701 | 0.048324 |
| FDCSP    | 2206.559 | 195.3267 | -3.497837 | 5.38E-06 | 1.18E-05 |
| CDH18    | 28.13217 | 75.42893 | 1.422897  | 0.000178 | 0.000328 |

|           |          |          |           |          |          |
|-----------|----------|----------|-----------|----------|----------|
| GDNF      | 31.10973 | 228.8703 | 2.879093  | 0.02321  | 0.031629 |
| PCDHAC2   | 33.49127 | 77.399   | 1.20853   | 7.26E-12 | 2.63E-11 |
| GMCL2     | 0.822943 | 1.798005 | 1.127533  | 1.83E-06 | 4.19E-06 |
| POU4F3    | 5.159601 | 34.63342 | 2.746833  | 0.033435 | 0.044322 |
| FABP7     | 585.2095 | 164.6783 | -1.829303 | 6.92E-05 | 0.000133 |
| GJB7      | 9.204489 | 20.91022 | 1.183799  | 2.13E-06 | 4.83E-06 |
| IYD       | 122.8329 | 285.5935 | 1.217266  | 2.52E-10 | 8.12E-10 |
| C6orf15   | 373.2095 | 15.45636 | -4.593713 | 0.001796 | 0.002896 |
| PSORS1C2  | 92.12469 | 6.094763 | -3.917946 | 0.032782 | 0.043538 |
| LTB       | 685.01   | 266.9052 | -1.359797 | 4.45E-11 | 1.52E-10 |
| CRISP3    | 1214.07  | 4299.663 | 1.824372  | 0.007012 | 0.010391 |
| KIAA0319  | 70.16209 | 140.9551 | 1.006472  | 1.21E-10 | 3.97E-10 |
| APOBEC2   | 6.254364 | 14.85786 | 1.248291  | 1.49E-08 | 4.15E-08 |
| CRISP1    | 3.077307 | 17.74564 | 2.527724  | 0.000501 | 0.00087  |
| COL9A1    | 50.82544 | 8.139651 | -2.642512 | 0.019971 | 0.027547 |
| HS3ST5    | 17.56608 | 55.40648 | 1.657262  | 0.000616 | 0.001057 |
| MEI4      | 22.90524 | 47.00249 | 1.03706   | 0.001183 | 0.001956 |
| SCIN      | 864.6633 | 1821.454 | 1.07488   | 0.035106 | 0.046359 |
| ZNF804B   | 10.6808  | 23.32668 | 1.126962  | 1.22E-05 | 2.56E-05 |
| DLX5      | 109.4414 | 51.6384  | -1.083642 | 0.00011  | 0.000208 |
| CLEC2L    | 14.89027 | 6.870324 | -1.11592  | 0.000696 | 0.001186 |
| NPC1L1    | 85.42145 | 193.5387 | 1.179951  | 1.44E-09 | 4.36E-09 |
| VSTM2A    | 1379.274 | 2861.905 | 1.053066  | 1.24E-05 | 2.61E-05 |
| ASB15     | 5.518703 | 11.95012 | 1.114624  | 0.000658 | 0.001127 |
| POF1B     | 417.4214 | 841.1721 | 1.010896  | 3.49E-07 | 8.56E-07 |
| GABRA3    | 33.89027 | 71.86783 | 1.084475  | 0.019676 | 0.027167 |
| NEXMIF    | 189.8803 | 396.4165 | 1.061927  | 3.80E-20 | 2.82E-19 |
| PCDH19    | 517.0399 | 1134.1   | 1.1332    | 4.98E-09 | 1.44E-08 |
| GDPD2     | 33.37656 | 97.21197 | 1.542299  | 1.98E-11 | 6.96E-11 |
| RTL9      | 28.15461 | 230.4913 | 3.033269  | 2.87E-06 | 6.43E-06 |
| GRIA3     | 108.0574 | 244.0249 | 1.175231  | 4.15E-05 | 8.23E-05 |
| PNMA3     | 46.82793 | 21.98753 | -1.090684 | 4.18E-08 | 1.12E-07 |
| GABRQ     | 103.4638 | 464.3317 | 2.166029  | 0.008583 | 0.012537 |
| CNGA2     | 11.70075 | 39.25187 | 1.746161  | 2.06E-05 | 4.23E-05 |
| PEBP4     | 254.98   | 104.1546 | -1.291658 | 1.18E-05 | 2.48E-05 |
| DEFB1     | 165.0274 | 69.48878 | -1.247854 | 4.22E-05 | 8.36E-05 |
| RAB11FIP1 | 6913.923 | 13875.68 | 1.004982  | 7.10E-22 | 6.34E-21 |
| CRISPLD1  | 2098.766 | 5321.007 | 1.342158  | 0.00857  | 0.01252  |
| PXDNL     | 398.8603 | 1105.903 | 1.471269  | 6.80E-10 | 2.12E-09 |
| TRPA1     | 716.7805 | 1999.85  | 1.480289  | 0.000433 | 0.000758 |
| WWP1      | 10119.67 | 20882.82 | 1.045154  | 2.12E-38 | 5.50E-36 |
| RIMS2     | 168.813  | 412.2269 | 1.288013  | 0.000273 | 0.00049  |
| LY6D      | 603.0274 | 79.16958 | -2.929206 | 3.62E-06 | 8.03E-06 |
| FAM135B   | 133.2195 | 294.8728 | 1.146288  | 1.25E-06 | 2.91E-06 |
| CSMD3     | 82.11471 | 244.9027 | 1.576496  | 6.99E-07 | 1.67E-06 |
| CHRNA6    | 58.15711 | 129.5411 | 1.155383  | 0.001285 | 0.002113 |
| TTPA      | 35.23192 | 71.01496 | 1.01124   | 1.22E-10 | 4.00E-10 |
| PII5      | 2853.608 | 7571.399 | 1.407772  | 0.008725 | 0.012728 |
| SCX       | 88.30673 | 42.7207  | -1.047588 | 3.57E-11 | 1.23E-10 |
| KCNK9     | 10.05486 | 23.33167 | 1.214396  | 0.010213 | 0.014747 |
| CNGB3     | 6.561097 | 15.44389 | 1.235027  | 8.01E-21 | 6.37E-20 |
| CCNE2     | 336.7805 | 726.8504 | 1.10985   | 1.19E-30 | 3.87E-29 |
| SLC30A8   | 2779.481 | 7554.224 | 1.442468  | 2.01E-09 | 5.99E-09 |
| GATA4     | 67.65835 | 136.399  | 1.011493  | 0.007112 | 0.010532 |
| HRCT1     | 129.4439 | 52.99501 | -1.288398 | 3.96E-10 | 1.26E-09 |
| ORM2      | 112.9776 | 51.94763 | -1.120906 | 0.037217 | 0.048946 |
| TAF1L     | 2.55611  | 6.678304 | 1.385532  | 0.002713 | 0.004261 |
| OBP2B     | 689.8429 | 337.7082 | -1.03049  | 1.01E-05 | 2.14E-05 |

|             |          |          |           |          |          |
|-------------|----------|----------|-----------|----------|----------|
| ANKRD18B    | 7.513716 | 23.62095 | 1.652468  | 8.42E-06 | 1.81E-05 |
| SCGB1D2     | 34058.64 | 11452.61 | -1.572345 | 0.002064 | 0.003301 |
| EEF1G       | 33.93017 | 16.82045 | -1.012353 | 1.11E-23 | 1.21E-22 |
| SCGB2A1     | 3553.628 | 614.6384 | -2.531483 | 0.002277 | 0.003615 |
| RAB39A      | 26.74564 | 54.35162 | 1.02302   | 1.09E-11 | 3.88E-11 |
| KCNC1       | 95.95012 | 194.1222 | 1.016608  | 0.003949 | 0.006058 |
| TMPRSS4     | 347.1471 | 733.5686 | 1.079385  | 0.000227 | 0.000411 |
| SAA2-SAA4   | 120.2718 | 59.28429 | -1.020577 | 2.35E-05 | 4.80E-05 |
| FAM181B     | 135.2344 | 61.08728 | -1.146518 | 3.92E-07 | 9.57E-07 |
| NCR3LG1     | 150.8828 | 307.7357 | 1.028263  | 1.45E-23 | 1.57E-22 |
| CHRM4       | 19.42394 | 40.23441 | 1.050594  | 0.000149 | 0.000277 |
| SLC22A24    | 3.441397 | 8.977556 | 1.383329  | 5.33E-08 | 1.41E-07 |
| KCNK7       | 34.30424 | 12.7581  | -1.426973 | 8.69E-07 | 2.06E-06 |
| CHRDL2      | 368.1421 | 51.18204 | -2.846553 | 0.003991 | 0.006119 |
| MYBPC3      | 14.61596 | 5.274314 | -1.470489 | 0.000171 | 0.000315 |
| IZUMO1R     | 2.995012 | 1.309227 | -1.193847 | 1.26E-08 | 3.53E-08 |
| SLC22A25    | 2.950125 | 9.19202  | 1.639606  | 1.46E-05 | 3.04E-05 |
| SYT8        | 329.9476 | 118.4913 | -1.477456 | 3.64E-10 | 1.16E-09 |
| ACBD7       | 38.43641 | 82.73815 | 1.106079  | 4.46E-20 | 3.29E-19 |
| SLIT1       | 194.02   | 807.1671 | 2.056662  | 0.00015  | 0.000278 |
| LGI1        | 23.85786 | 67.81546 | 1.50715   | 0.013673 | 0.019333 |
| ACSM6       | 4.633416 | 10.49127 | 1.179041  | 0.000664 | 0.001137 |
| COMMD3-BMI1 | 4.21197  | 9.53616  | 1.178913  | 3.91E-08 | 1.05E-07 |
| FAM234B     | 5873.337 | 12159.81 | 1.049868  | 6.52E-23 | 6.42E-22 |
| SYT10       | 3.950125 | 22.24439 | 2.493471  | 4.06E-08 | 1.08E-07 |
| KRT6B       | 2308.092 | 600.2419 | -1.943085 | 0.001569 | 0.002551 |
| AQP5        | 610.3392 | 224.2793 | -1.444315 | 0.000151 | 0.00028  |
| KRT86       | 347.0224 | 148.6908 | -1.222714 | 0.000464 | 0.00081  |
| KRT5        | 11046.99 | 5364.985 | -1.042007 | 3.00E-05 | 6.03E-05 |
| E2F7        | 211.8279 | 437.788  | 1.04734   | 6.66E-24 | 7.46E-23 |
| ASCL1       | 314.0723 | 787.7855 | 1.326706  | 1.09E-05 | 2.32E-05 |
| RPH3A       | 8.957606 | 21.09975 | 1.236041  | 0.034063 | 0.045066 |
| OTOGL       | 38.52369 | 91.52868 | 1.248478  | 1.72E-10 | 5.60E-10 |
| KRT79       | 77.10973 | 12.33167 | -2.644545 | 0.005153 | 0.00779  |
| KRT81       | 2489.953 | 732.1372 | -1.765932 | 6.21E-07 | 1.49E-06 |
| OVCH1       | 5.710723 | 17.3192  | 1.600627  | 0.018354 | 0.025451 |
| GPR12       | 60.24688 | 14.48878 | -2.055951 | 0.021528 | 0.029505 |
| FREM2       | 272.217  | 754.6484 | 1.471048  | 1.37E-05 | 2.87E-05 |
| OLFM4       | 4021.087 | 1667.055 | -1.270284 | 0.004925 | 0.007464 |
| HS6ST3      | 599.4239 | 1376.002 | 1.198834  | 1.10E-09 | 3.35E-09 |
| LRRC9       | 5.416459 | 11.14464 | 1.040928  | 4.57E-06 | 1.01E-05 |
| TCL1B       | 7.561097 | 21.27681 | 1.492614  | 0.000181 | 0.000333 |
| CMTM5       | 15.37157 | 5.321696 | -1.530307 | 0.000143 | 0.000267 |
| TCL1A       | 118.4813 | 50.59352 | -1.227635 | 0.02771  | 0.037251 |
| SMOC1       | 458.4863 | 163.3117 | -1.48925  | 0.002246 | 0.003569 |
| ZDHHC22     | 20.91022 | 78.72319 | 1.91258   | 0.0024   | 0.003797 |
| EML5        | 23.07232 | 58.74065 | 1.348196  | 1.15E-16 | 6.19E-16 |
| TUNAR       | 45.40648 | 20.73067 | -1.131131 | 0.008873 | 0.012927 |
| OCA2        | 20.76808 | 7.179551 | -1.532402 | 0.0053   | 0.007998 |
| HCN4        | 12.63591 | 34.15711 | 1.434656  | 0.005681 | 0.008535 |
| WDR72       | 218.7207 | 557.9776 | 1.351117  | 0.01356  | 0.019191 |
| RHCG        | 195.5411 | 35.59102 | -2.457887 | 0.002291 | 0.003636 |
| SLC28A2     | 15.90025 | 37.72319 | 1.246402  | 0.013591 | 0.019228 |
| TGM5        | 90.6783  | 33.51122 | -1.436113 | 0.000115 | 0.000216 |
| SHISA9      | 377.3267 | 838.0623 | 1.151243  | 6.00E-15 | 2.79E-14 |
| MYLK3       | 20.05237 | 42.02494 | 1.067473  | 1.46E-09 | 4.41E-09 |
| SYCE1L      | 68.50873 | 30.41895 | -1.171317 | 3.51E-16 | 1.82E-15 |
| CD19        | 131.419  | 58.01746 | -1.179614 | 0.000691 | 0.001179 |

|           |          |          |           |          |          |
|-----------|----------|----------|-----------|----------|----------|
| GDPD3     | 365.2469 | 850.2968 | 1.219094  | 0.017234 | 0.02401  |
| GPR139    | 17.44888 | 47.35661 | 1.440432  | 1.84E-07 | 4.64E-07 |
| PRSS33    | 59.50374 | 3.034913 | -4.293253 | 0.009178 | 0.013336 |
| SOX8      | 194.98   | 57.59601 | -1.759286 | 1.54E-08 | 4.27E-08 |
| SLC6A4    | 798.4464 | 1668.559 | 1.063335  | 0.003145 | 0.004891 |
| PNMT      | 1194.012 | 204.2319 | -2.547538 | 0.001259 | 0.002071 |
| LPO       | 39.41895 | 11.28429 | -1.804574 | 0.035314 | 0.046622 |
| IGF2BP1   | 16.95761 | 55.86534 | 1.720021  | 0.003835 | 0.005899 |
| TNFRSF13B | 45.02244 | 21.28678 | -1.080686 | 6.80E-07 | 1.63E-06 |
| B4GALNT2  | 132.788  | 273.5885 | 1.042883  | 0.002289 | 0.003633 |
| TEX19     | 13.64589 | 27.56858 | 1.014559  | 5.56E-09 | 1.60E-08 |
| PRR11     | 736.0125 | 1686.451 | 1.196189  | 9.92E-13 | 3.86E-12 |
| ALOX15    | 66.70823 | 328.2469 | 2.298845  | 1.46E-25 | 2.04E-24 |
| KRT24     | 21.70823 | 51.22943 | 1.238731  | 0.009743 | 0.014104 |
| CD79B     | 396.1247 | 197.0623 | -1.007302 | 3.53E-08 | 9.47E-08 |
| LHX1      | 44.86534 | 115.9177 | 1.369428  | 0.000272 | 0.000489 |
| KRT14     | 8912.516 | 3820.197 | -1.222186 | 5.45E-08 | 1.44E-07 |
| KRT16     | 1321.045 | 355.3242 | -1.894472 | 3.65E-07 | 8.94E-07 |
| KLHL11    | 189.2843 | 385.0823 | 1.024612  | 7.56E-42 | 6.37E-39 |
| CELF4     | 59.27431 | 141.783  | 1.258206  | 0.006233 | 0.009295 |
| ONECUT2   | 114.4165 | 290.9576 | 1.346514  | 0.000156 | 0.00029  |
| DIPK1C    | 45.66085 | 19.80798 | -1.204876 | 5.58E-05 | 0.000109 |
| LRRN4     | 15.20948 | 35.32668 | 1.215788  | 0.029434 | 0.039402 |
| PI3       | 216.9127 | 77.74065 | -1.480374 | 0.003415 | 0.005287 |
| GDF5      | 45.64838 | 16.27681 | -1.487746 | 2.88E-05 | 5.82E-05 |
| RIMS4     | 1654.065 | 3364.653 | 1.024442  | 1.69E-07 | 4.27E-07 |
| MMP9      | 8820.072 | 4377.773 | -1.010593 | 0.015453 | 0.021675 |
| COL9A3    | 408.2993 | 172.2793 | -1.244878 | 1.95E-09 | 5.84E-09 |
| C20orf141 | 2.805486 | 1.27182  | -1.141356 | 0.004984 | 0.007549 |
| ZNF729    | 9.416459 | 31.62594 | 1.747852  | 3.72E-06 | 8.25E-06 |
| CYP2A6    | 2193.988 | 6289.09  | 1.519296  | 0.000189 | 0.000346 |
| CYP2B6    | 15.41646 | 36.01496 | 1.224125  | 1.36E-05 | 2.86E-05 |
| KRTDAP    | 411.187  | 14.41397 | -4.834256 | 0.007148 | 0.010582 |
| MIA       | 152.7007 | 44.70574 | -1.772175 | 2.83E-09 | 8.35E-09 |
| SBSN      | 512.0125 | 30.94514 | -4.048394 | 0.007904 | 0.011611 |
| ATP1A3    | 177.6459 | 404.616  | 1.187549  | 0.002365 | 0.003747 |
| FCER2     | 74       | 22.89776 | -1.692319 | 7.63E-05 | 0.000146 |
| GZMM      | 131.9252 | 61.38903 | -1.103667 | 3.75E-10 | 1.19E-09 |
| LGALS7B   | 256.9825 | 15.1596  | -4.083367 | 0.014513 | 0.020431 |
| GFY       | 4.541147 | 16.24439 | 1.838813  | 4.35E-05 | 8.60E-05 |
| LGALS7    | 19.04239 | 8.74813  | -1.122168 | 0.000175 | 0.000323 |
| EFNA2     | 4.082294 | 8.261845 | 1.017084  | 0.004837 | 0.007337 |
| PEG3      | 1306.875 | 3498.601 | 1.420657  | 1.80E-08 | 4.97E-08 |
| ZIM2      | 6.456359 | 18.02993 | 1.481601  | 2.81E-09 | 8.29E-09 |
| KLK6      | 484.202  | 156.1995 | -1.632219 | 0.002106 | 0.003363 |
| KLK7      | 381.8105 | 166.7681 | -1.195014 | 0.00516  | 0.007799 |
| FAM187B   | 7.912718 | 0.82793  | -3.256592 | 0.000236 | 0.000426 |
| IGLL1     | 8.40399  | 2.743142 | -1.615245 | 0.00294  | 0.004593 |
| ELFN2     | 68.8005  | 146.4688 | 1.090103  | 0.00816  | 0.011963 |
| USP41     | 11.05985 | 27.96259 | 1.338166  | 8.80E-11 | 2.93E-10 |
| MLC1      | 126.1372 | 44.4414  | -1.505017 | 0.010652 | 0.015336 |
| DSCAM     | 15.21197 | 33.25935 | 1.128553  | 0.036249 | 0.047758 |
