# Supplementary material for: Exploration of prognosis and immunometabolism landscapes in ER+ breast cancer based on a novel lipid metabolism-related signature
Source: PubMed Central journal article supplement (PMC10352658; doi:10.3389/fimmu.2023.1199465), 2023-07-04
Supplement: Table_8.pdf [file Table_8.pdf]

| id       | GeneClass |
|----------|-----------|
| STAT1    | STAT1     |
| GBP1     | STAT1     |
| TAP1     | STAT1     |
| IRF1     | STAT1     |
| CXCL9    | STAT1     |
| PSMB9    | STAT1     |
| CXCL10   | STAT1     |
| CXCL11   | STAT1     |
| IFIH1    | STAT1     |
| HLA-F    | MHC-I     |
| HLA-B    | MHC-I     |
| HLA-G    | MHC-I     |
| HLA-A    | MHC-I     |
| HLA-C    | MHC-I     |
| HLA-DPB1 | MCH-II    |
| CTSS     | MCH-II    |
| HLA-DMB  | MCH-II    |
| HLA-DRB1 | MCH-II    |
| HLA-DRA  | MCH-II    |
| CD74     | MCH-II    |
| HLA-DPA1 | MCH-II    |
| HLA-DQA1 | MCH-II    |
| HLA-DMA  | MCH-II    |
| CCL5     | LCK       |
| IL2RG    | LCK       |
| CD48     | LCK       |
| SELL     | LCK       |
| LCK      | LCK       |
| GZMA     | LCK       |
| IL7R     | LCK       |
| KLRK1    | LCK       |
| CD2      | LCK       |
| STAT4    | LCK       |
| SLAMF1   | LCK       |
| CCR7     | LCK       |
| GZMK     | LCK       |
| CCR2     | LCK       |
| SH2D1A   | LCK       |
| ITK      | LCK       |
| CD3D     | LCK       |
| GIMAP5   | LCK       |
| PLAC8    | LCK       |
| GIMAP4   | LCK       |
| PRG1     | LCK       |
| HCLS1    | LCK       |
| INPP5D   | LCK       |
| CD53     | LCK       |
| SLA      | LCK       |
| PIK3CD   | LCK       |
| IRF8     | LCK       |
| FGL2     | LCK       |
| IL10RA   | LCK       |
| CSF2RB   | LCK       |
| LCP2     | LCK       |
| CORO1A   | LCK       |
| SELPLG   | LCK       |
| EVI2B    | LCK       |

|          |            |
|----------|------------|
| PTPRC    | LCK        |
| RAC2     | LCK        |
| LPXN     | LCK        |
| ARHGAP15 | LCK        |
| SAMSN1   | LCK        |
| MX1      | Interferon |
| IFI27    | Interferon |
| OAS1     | Interferon |
| IFIT1    | Interferon |
| IFI44L   | Interferon |
| IFIT3    | Interferon |
| OAS2     | Interferon |
| RSAD2    | Interferon |
| OAS3     | Interferon |
| IFI30    | HCK        |
| LAPTM5   | HCK        |
| ITGB2    | HCK        |
| C1QB     | HCK        |
| CD163    | HCK        |
| TYROBP   | HCK        |
| FCER1G   | HCK        |
| CCR1     | HCK        |
| TFEC     | HCK        |
| NCF2     | HCK        |
| LAIR1    | HCK        |
| CD86     | HCK        |
| C1QA     | HCK        |
| MS4A4A   | HCK        |
| MNDA     | HCK        |
| AIF1     | HCK        |
| LST1     | HCK        |
| DOCK2    | HCK        |
| RNASE6   | HCK        |
| MS4A6A   | HCK        |
